# Supplementary material
Source: PubMed Central journal article supplement (PMC5134972)
Supplement: supp_tpc.16.00062_revised_Supplemental_Data_100316.pdf [file supp_tpc.16.00062_revised_Supplemental_Data_100316.pdf]

## SUPPLEMENTAL DATA

### SUPPLEMENTAL FIGURES

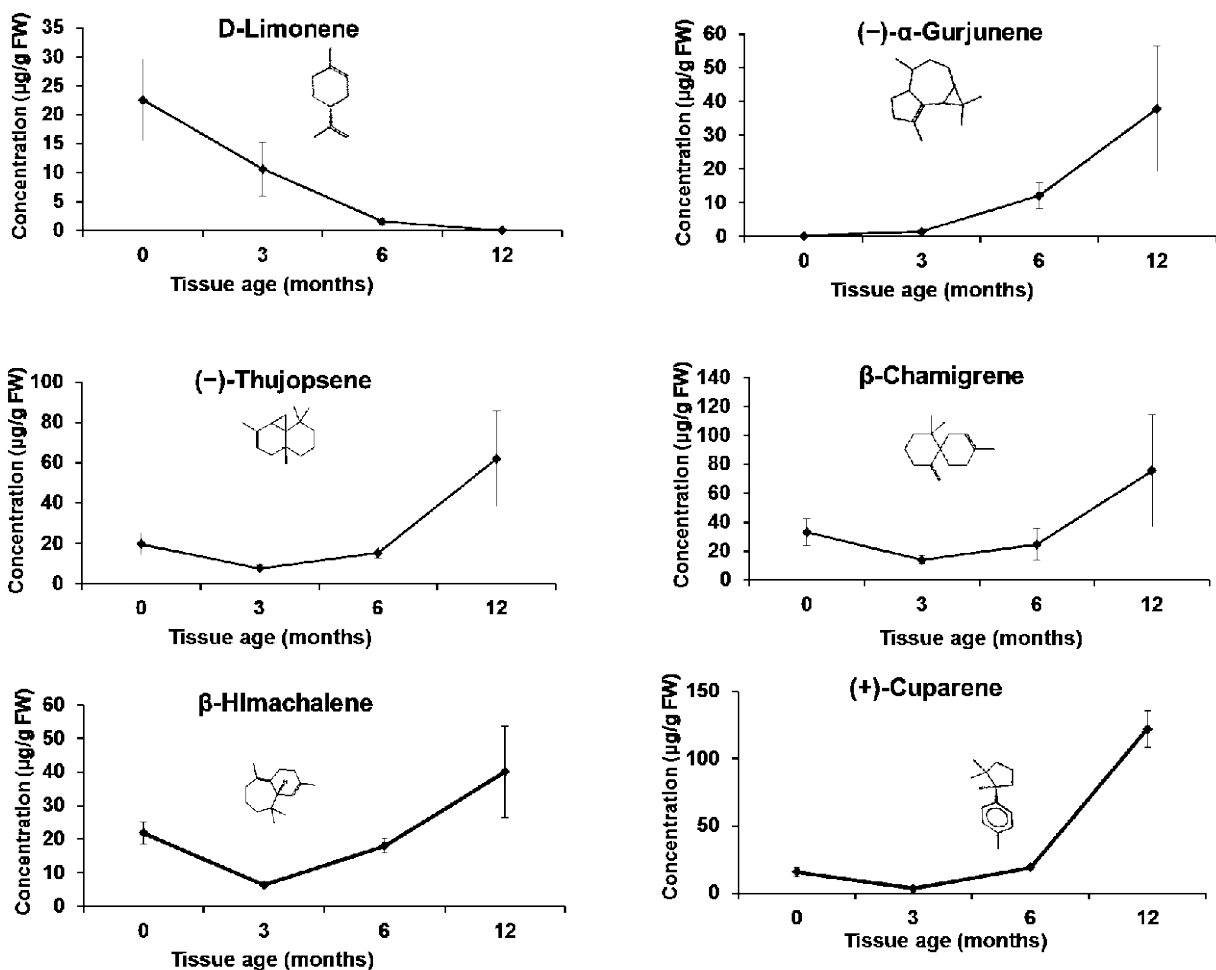

**Supplemental Figure 1.** Major terpenes present in axenic (sterile) cultures of *Marchantia polymorpha* harvested after 0, 3, 6, 12 months of growth.

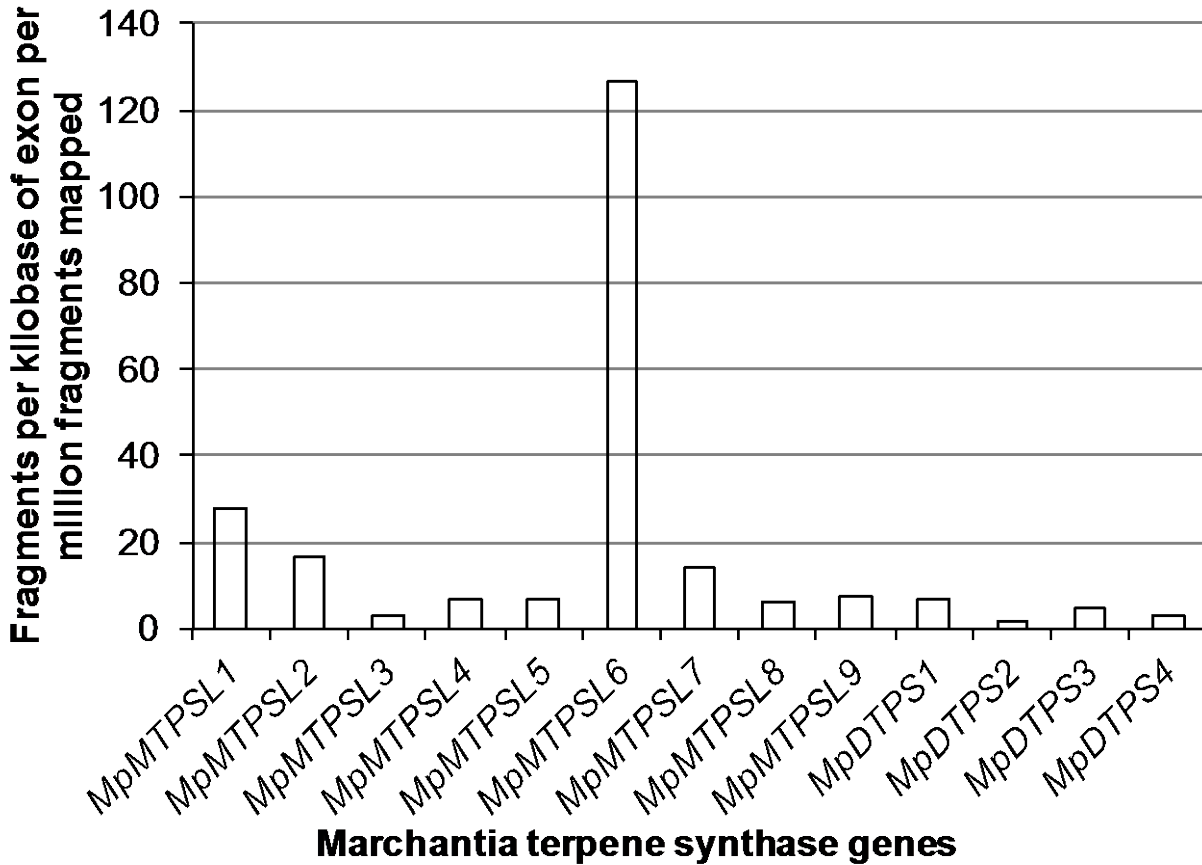

**Supplemental Figure 2.** Measurement of terpene synthase-like gene expression based on the Fragments per kilobase of exon per million fragments mapped (FPKM).

We relied on the methods of Yeo et al. (2013) to validate the use of map reads to gain a relative appreciation for transcripts levels in *M. polymorpha*, which were corroborated by RT-PCR measurements (see Supplemental Figure 5).

Yeo, Y.S. et al. (2013) Functional identification of valerena-1,10-diene synthase, a terpene synthase catalyzing a unique chemical cascade in the biosynthesis of biologically active sesquiterpenes in *Valeriana officinalis*. J. Biol. Chem. 288: 3163-73.

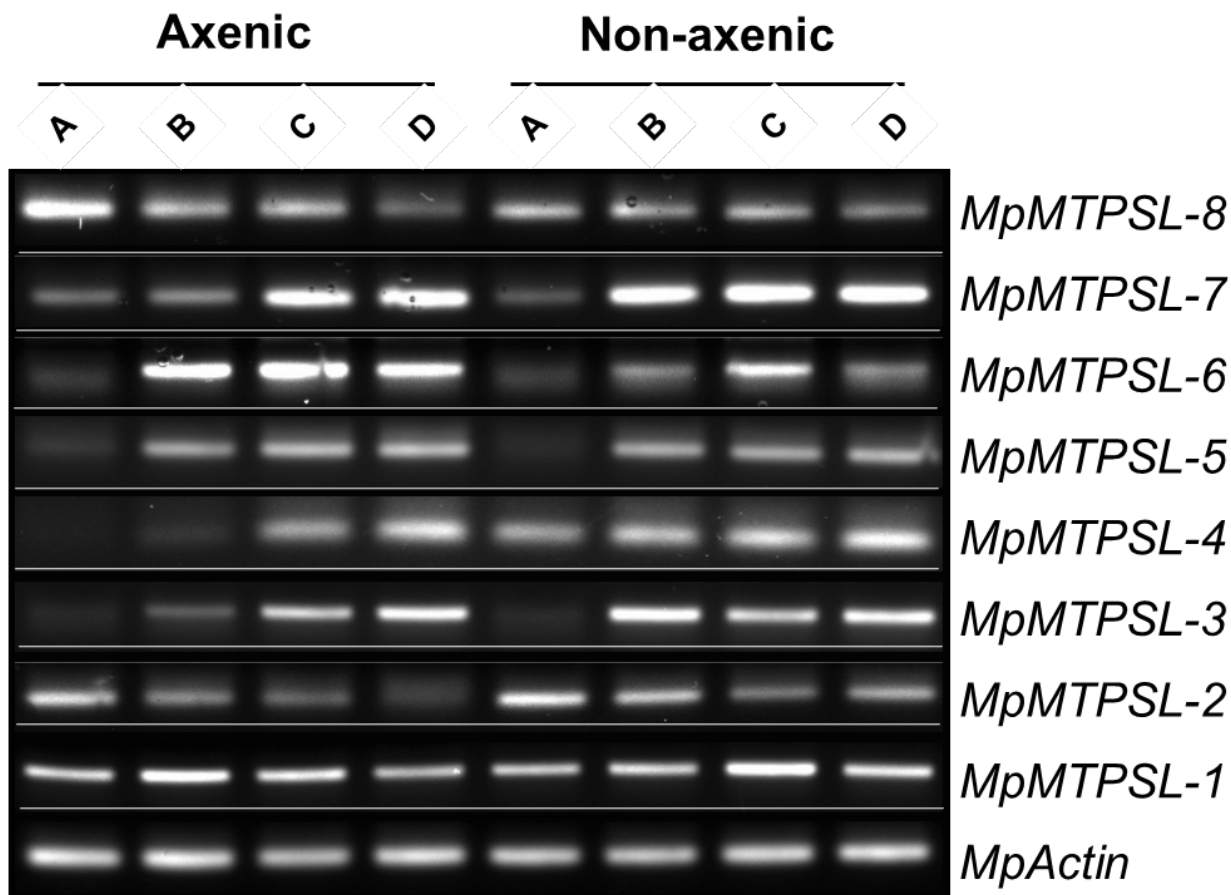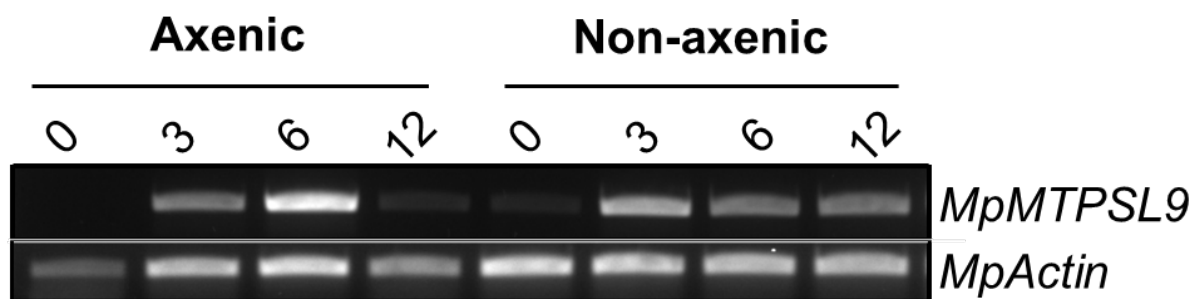

**Supplemental Figure 3.** Relative expression of the terpene synthase-like genes (*MpMTPSL*) from axenic as well as non-axenic *M. polymorpha* tissue grown for 0 (A), 3 (B), 6 (C) and 12 (D) months.

Qualitative PCR was performed for terpene synthase like genes using 250 ng of cDNA templates from axenic as well as non-axenic cultures of *M. polymorpha* as described in detail in the Materials and Methods.

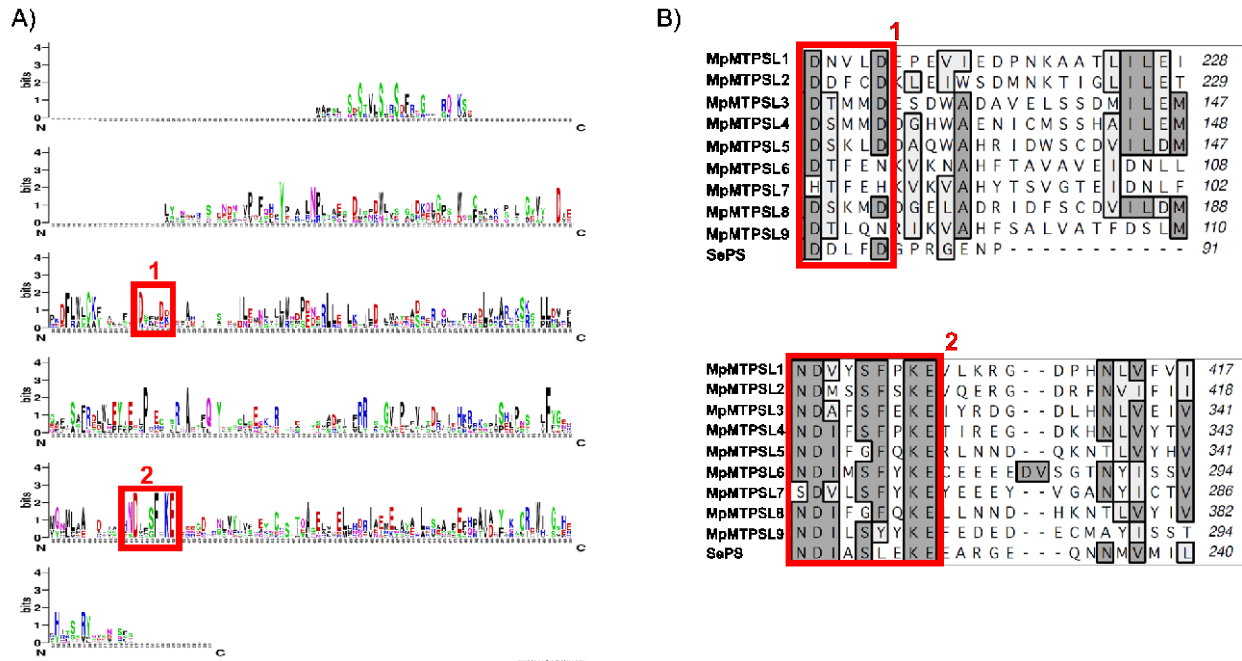

**Supplemental Figure 4.** Web logo based consensus sequence pattern for *Marchantia* terpene synthase like genes and Aspartate-rich substrate binding motif description using clustalW alignment.

Aspartate-rich substrate binding motif was calculated using WebLogo based on an alignment of the 9 *Marchantia* terpene synthase like genes (MpMTPSL1-9) (A). The bigger the letter, the more conserved the amino acid site. The alignment was produced from commercially available Mac-vector plugins for Clustal W using MpMTPSL1-9 along with the bacterial pentalene synthase gene (GenBank Accession AAA19131) (B). The conserved metal binding motifs, the DDXXD motif (1) and the NDXXSXXXE motif (2) are highlighted in red.

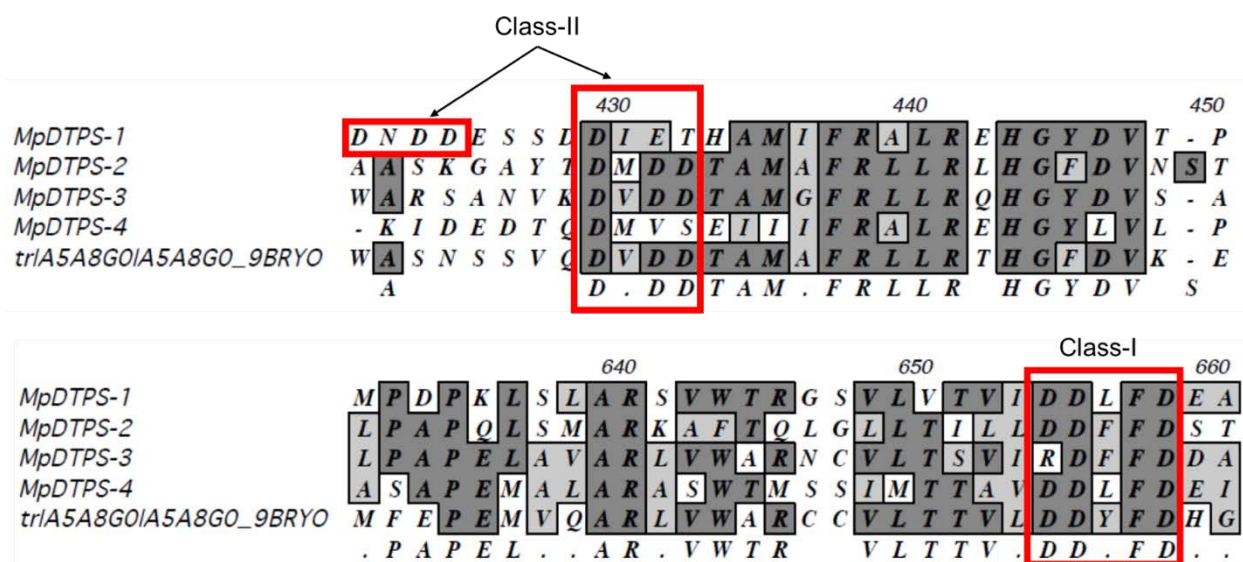

**Supplemental Figure 5.** Clustal W alignment of the diterpene synthase-like genes present in *M. polymorpha* (MpDTPS 1-4) centered on Class I (DXDD) and Class II (DXDD) divalent metal binding motifs.

Alignment was produced from commercially available Clustal W plugins for MacVector using MpDTPS 1-4 along with *Physcomitrella patens* ent-kaurene synthase gene (PpCPS/KS) (GenBank Accession AB302933.1). The conserved aspartate-rich motifs for Class-I and Class-II are highlight by red blocks.

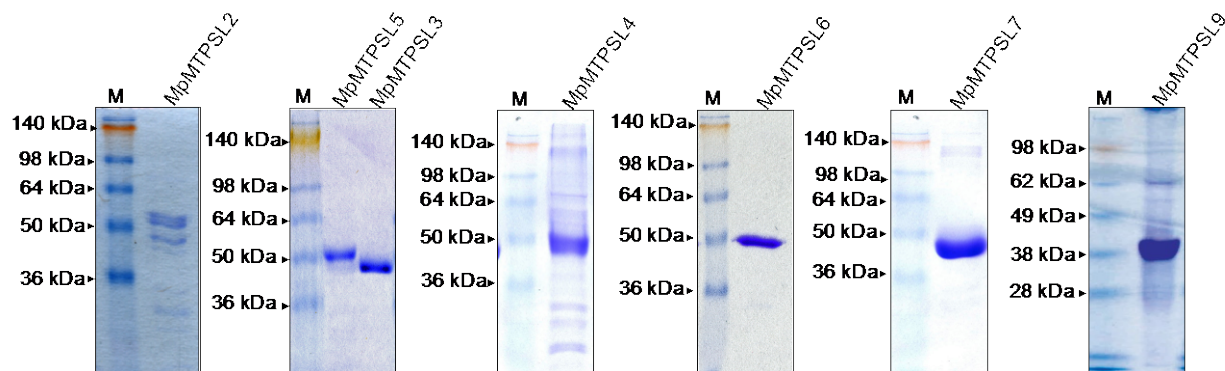

**Supplemental Figure 6.** Purification of recombinant MpMTPSL terpene synthases.

Coomassie Blue-stained SDS-PAGE gel, showing recombinant MpMTPSL-2, 3, 4, 5, 6 and 7 expressed in *E. coli* BL21-DE3 and after  $\text{Co}^{2+}$ -affinity purification. Separation of 2.5  $\mu\text{g}$  of each protein was performed on 10% discontinuous SDS-polyacrylamide gels.

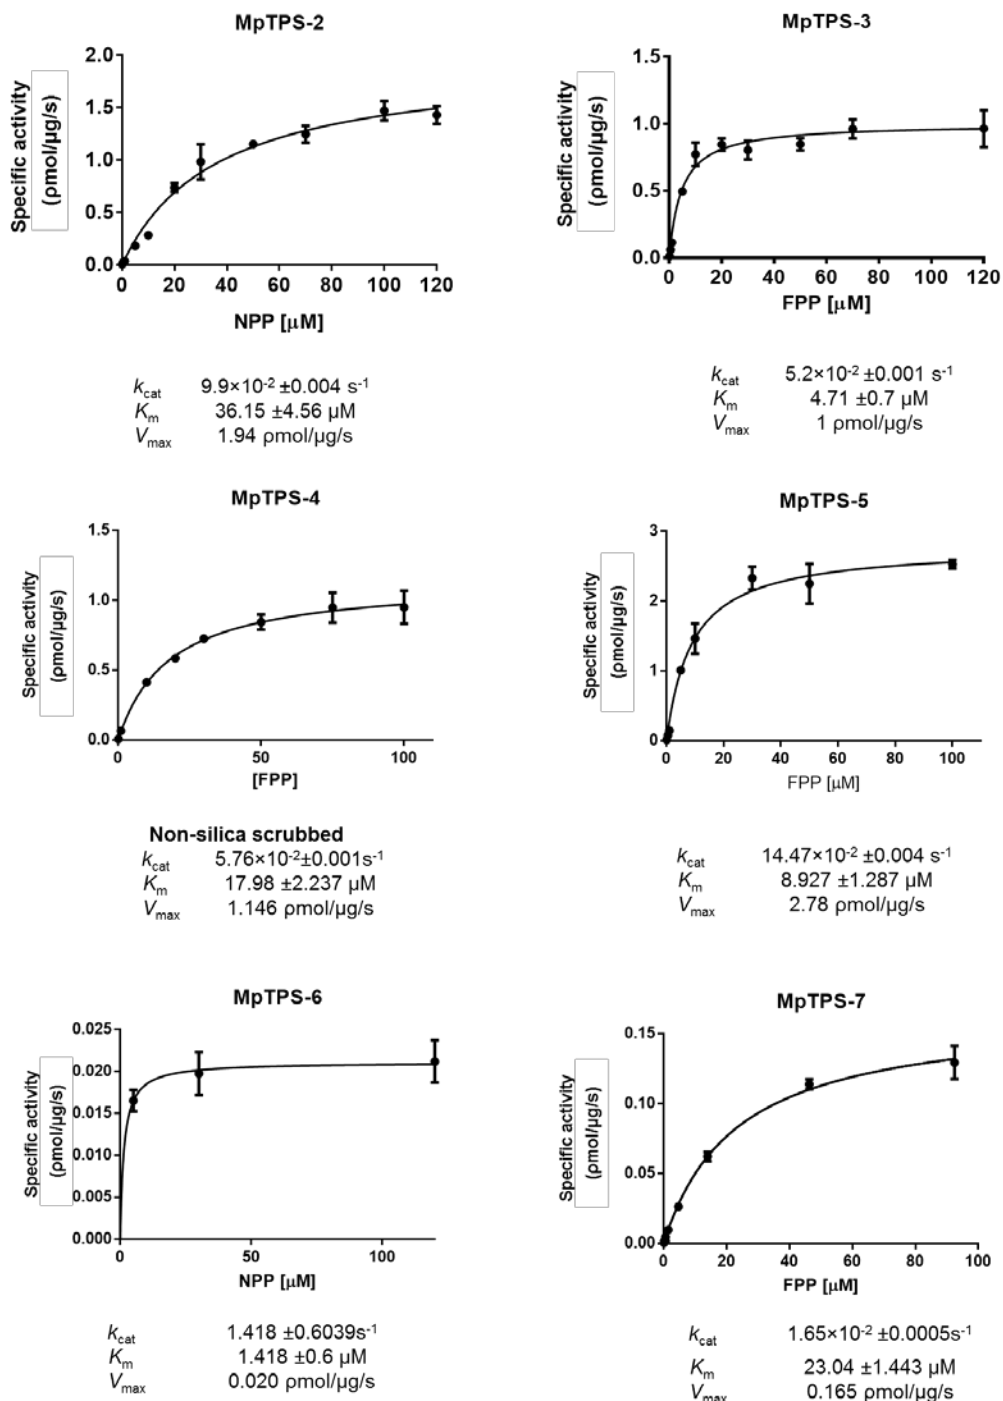

**Supplemental Figure 7A.** Enzyme kinetic determinations for MpMTPSL2, 3, 4, 5, 6, 7.

Enzyme assays (50 μl) were set up with purified MpMTPSL1-7 at 100 nM and the indicated concentration of  $^3\text{H-NPP}$ ,  $^3\text{H-GPP}$ , and  $^3\text{H-FPP}$ . Assays were incubated for 5 min at 37°C and stopped by addition of 50 μl stop buffer. The reactions were then extracted with 200 μl of hexane and radioactivity determined in aliquots by scintillation spectrometry. The data was analyzed using the Prism Graphpad 6.0. Data represents mean of triplicate assays.

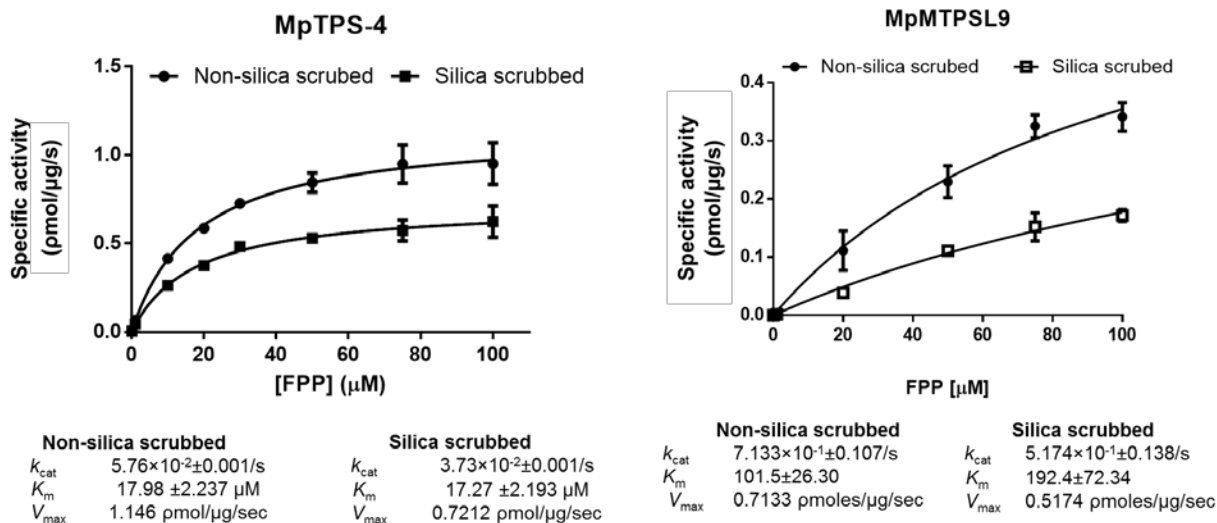

**Supplemental Figure 7B.** Enzyme kinetic determinations for MpMTPSL4 and MpMTPSL9 for total (non-scrubbed) and all hydrocarbon (scrubbed) reaction products.

Enzyme assays (50  $\mu$ l) were set up with purified MpMTPSL4 or MpMTPSL9 at 100 nM and the indicated concentration of  $^3\text{H}$ -FPP. Assays were incubated for 5 min at 37°C and stopped by addition of 50  $\mu$ l stop buffer. The reactions were then extracted with 200  $\mu$ l of hexane, aliquots which were subject to silica-scrub or not prior to scintillation counting. The data was analyzed using the Prism Graphpad 6.0. Data represents mean of triplicate assays.

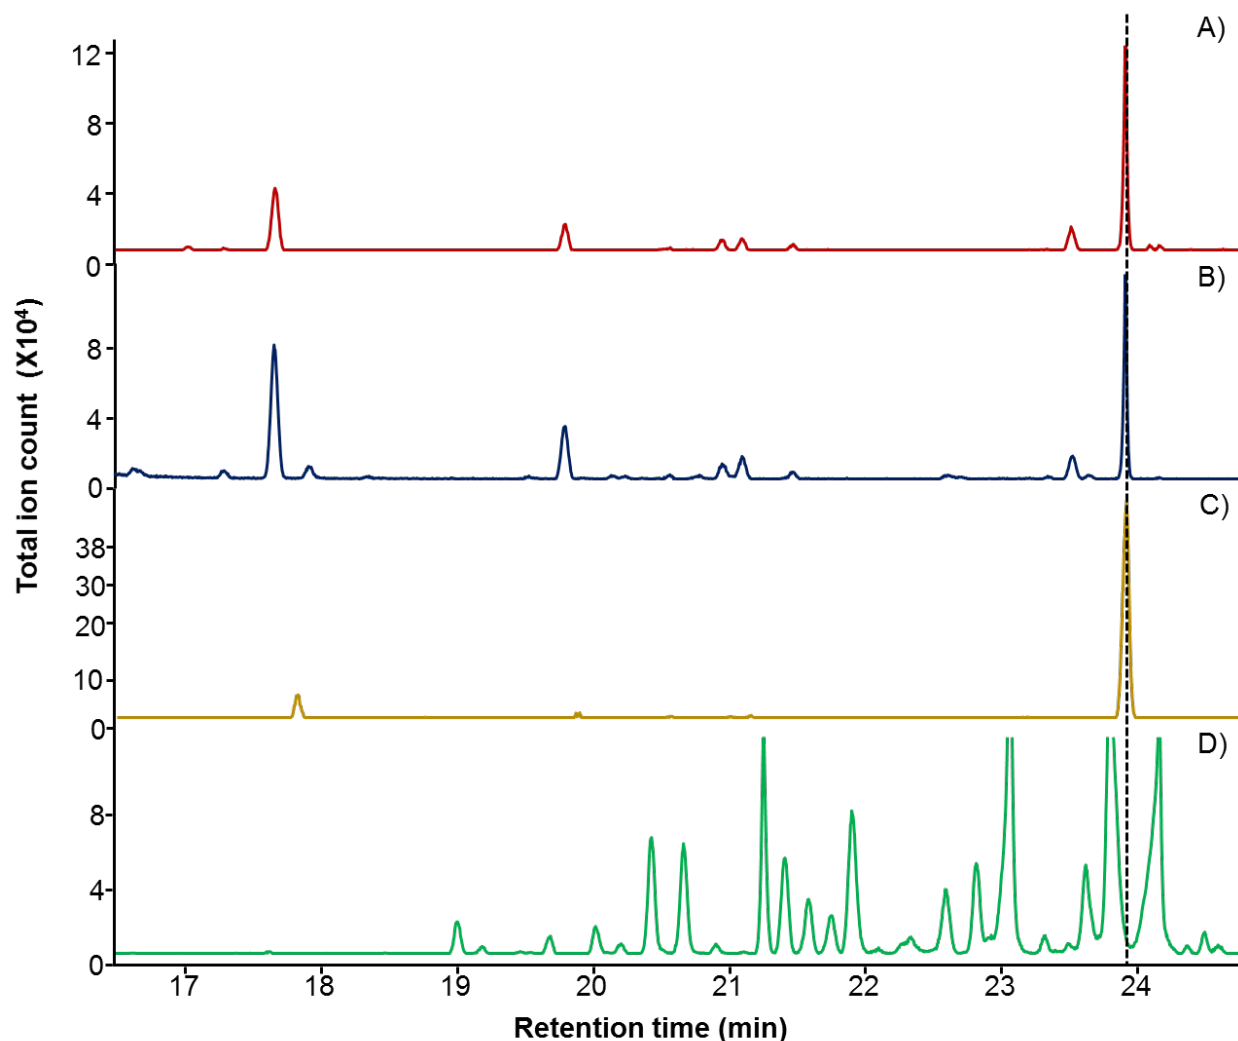

**Supplemental Figure 8.** GC chromatograms of terpene reaction product(s) generated by MpMTPSL3 *in vitro* and *in vivo*.

GC chromatograms of the *in vitro* products formed by MpMTPSL3 (~100 nM) incubated with 100  $\mu$ M FPP (A) and the *in vivo* products generated by *E. coli* (B) or yeast (C) cultures expressing the MpMTPSL3 gene. GC chromatogram of extractable terpenes from *M. polymorpha* (D) and annotated for the overlapping products (dashed black line) present in multiple samples.



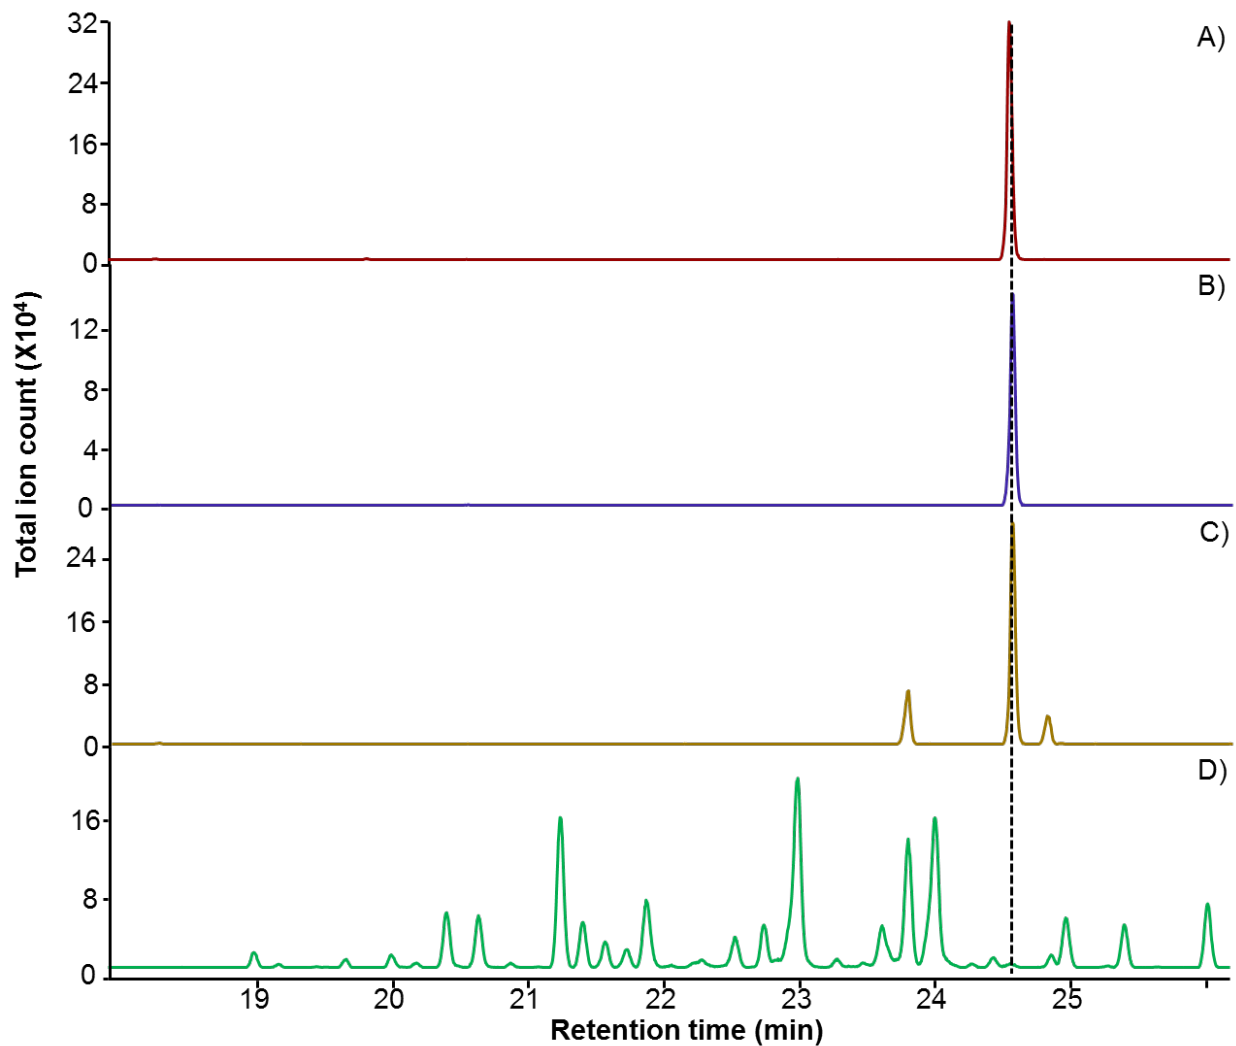

**Supplemental Figure 9.** Gas chromatogram of terpene reaction product(s) generated by MpMTPSL5 in vitro and in vivo.

GC chromatograms of the in vitro products formed by MpMTPSL5 (~100 nM) incubated with 100  $\mu$ M FPP (A) and the in vivo products generated by *E. coli* (B) or yeast (C) cultures expressing the MpMTPSL5 gene. GC chromatogram of extractable terpenes from *M. polymorpha* (D) and annotated for the overlapping products (dashed black line) present in multiple samples.

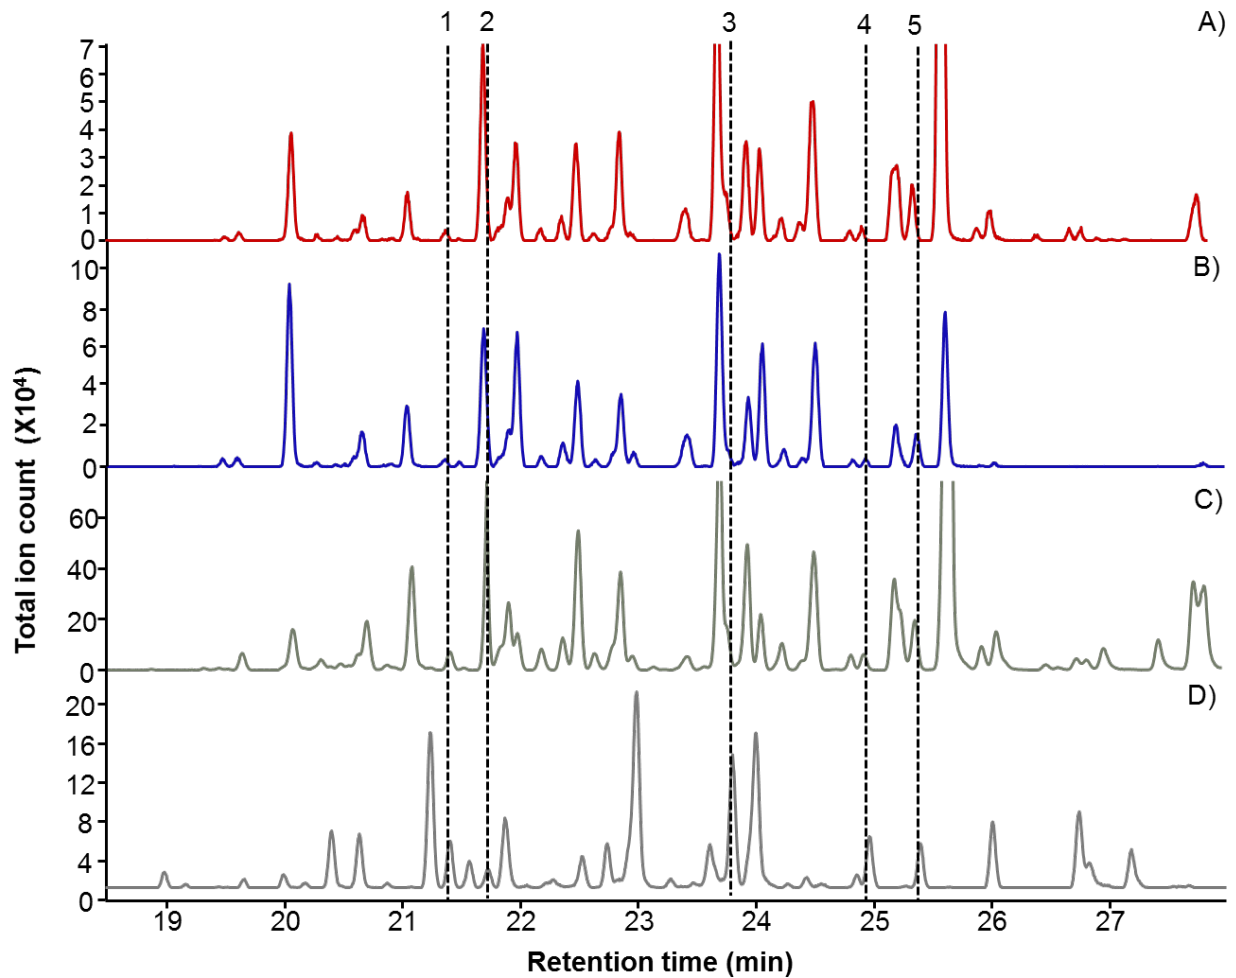

**Supplemental Figure 10.** Gas chromatogram of terpenes generated by MpMTPSL7 in vitro and in vivo.

GC chromatograms of the in vitro products formed by MpMTPSL7 (~100 nM) incubated with 100  $\mu$ M FPP (A) and the in vivo products generated by *E. coli* (B) or yeast (C) cultures expressing the MpMTPSL7 gene. GC chromatogram of extractable terpenes from *M. polymorpha* (D) and annotated for the overlapping products (dashed black line) present in multiple samples.

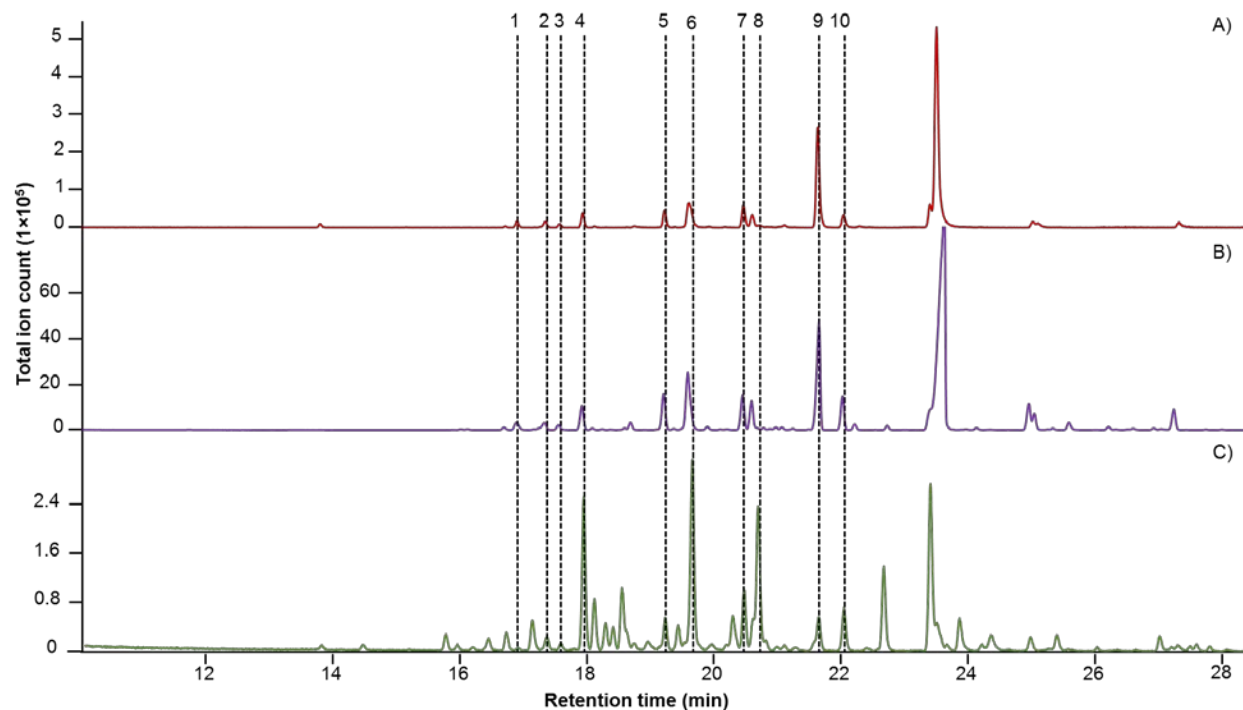

**Supplemental Figure 11.** Gas chromatogram of terpenes generated by MpMTPSL9 in vitro and in vivo.

GC chromatograms of the in vitro products formed by MpMTPSL9 (~100 nM) incubated with 100  $\mu$ M FPP (A) and the in vivo products generated by *E. coli* (B) and GC chromatogram of extractable terpenes from *M. polymorpha* (C) and annotated for the overlapping products (dashed black line) present in multiple samples.

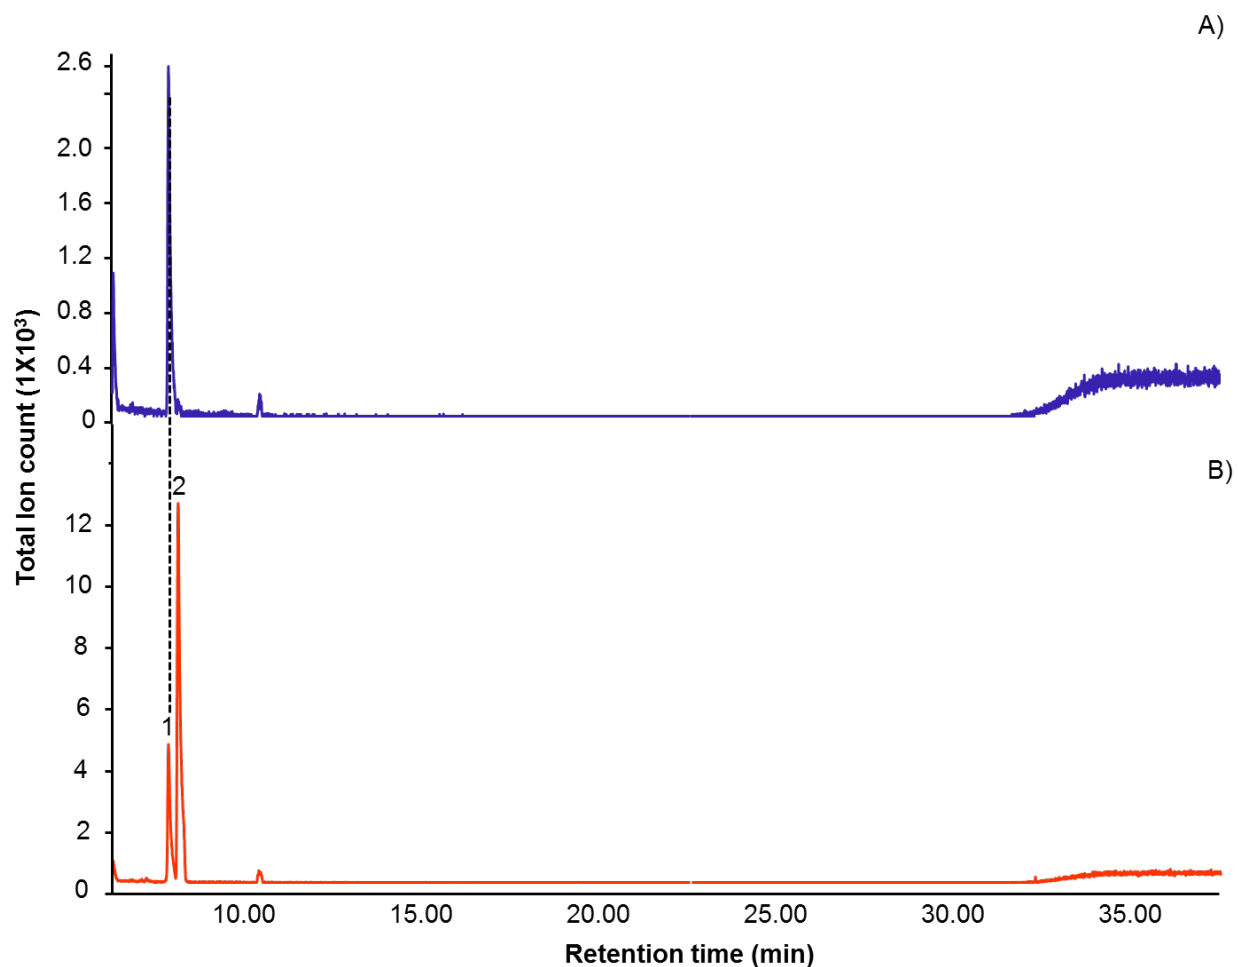

**Supplemental Figure 12.** GC chromatogram of terpene reaction product(s) generated in vitro by MpMTPSL6.

GC chromatogram of the in vitro products formed by MpMTPSL6 (~100 nM) incubated with 100  $\mu$ M GPP (A) in comparison to a chromatogram for ocimene (B) where the two peaks in chromatogram represents cis- $\beta$ -ocimene (1) and trans- $\beta$ -ocimene (2).

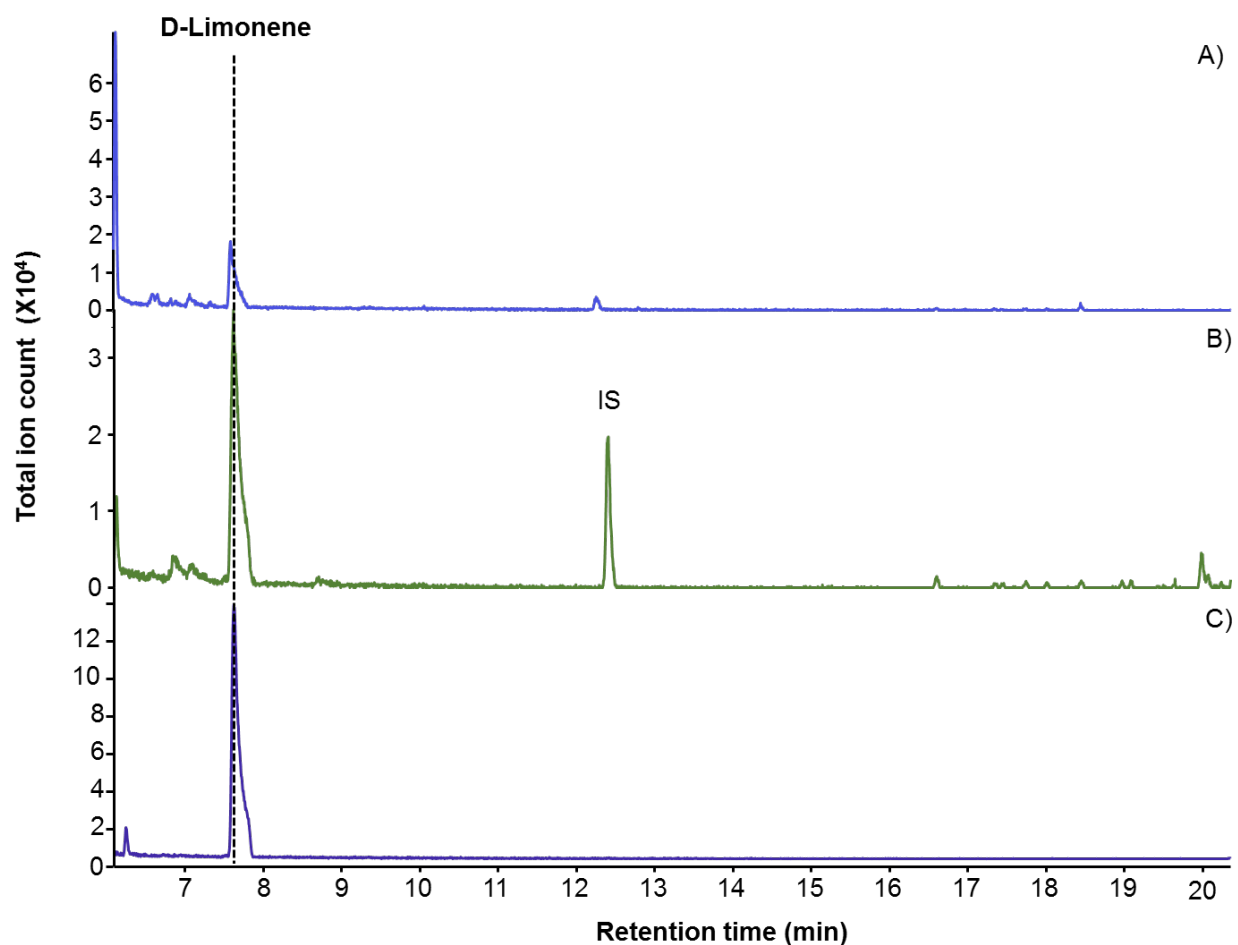

**Supplemental Figure 13.** GC chromatograms of terpene reaction product(s) generated by MpMTPSL2 in vitro using NPP as substrate.

GC chromatograms of the in vitro products formed by MpMTPSL2 (100 nM) incubated with 100  $\mu$ M NPP (A) in comparison to the D-limonene in *M. polymorpha* (0 month axenic culture, prior to developmental accumulation of most sesquiterpenes), and an authentic D-limonene standard.

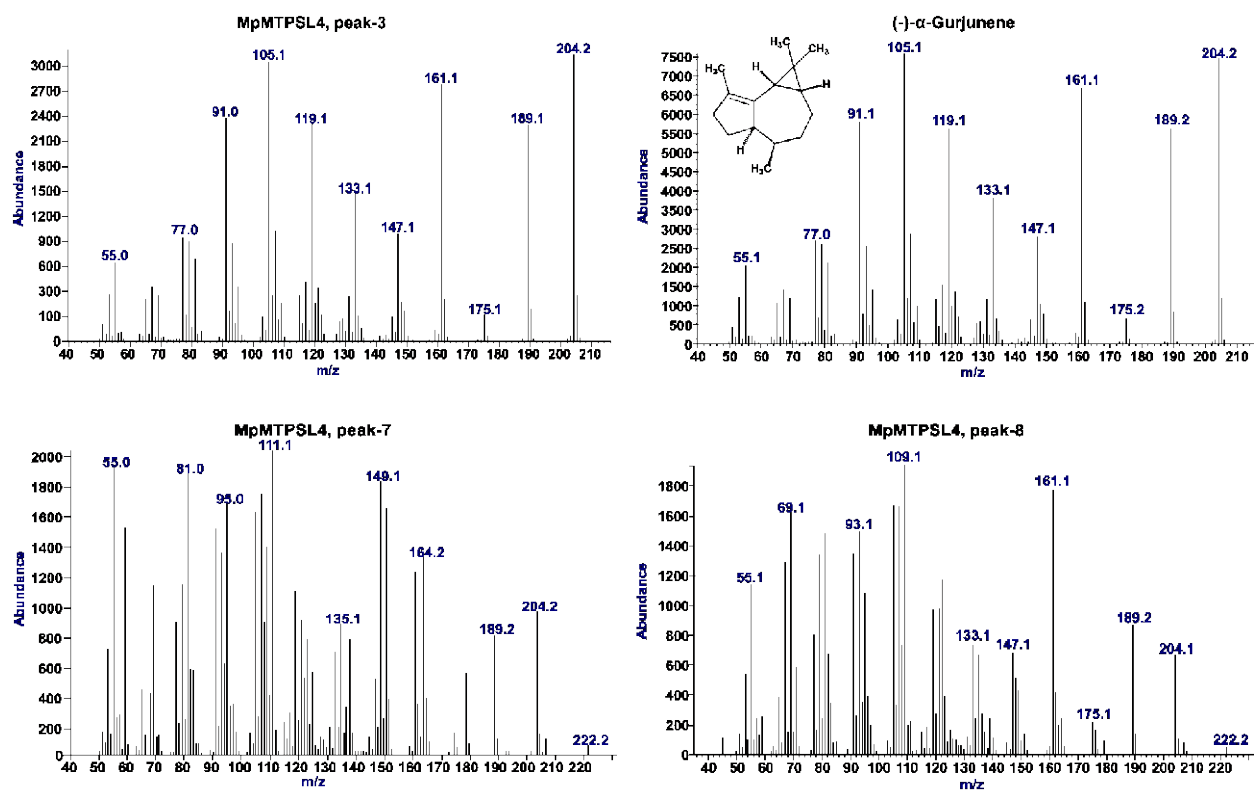

**Supplemental Figure 14.** Mass spectra of selected compounds produced by MpMTPSL4 as shown in Figure 6 and for (-) alpha-gurjunene standard.

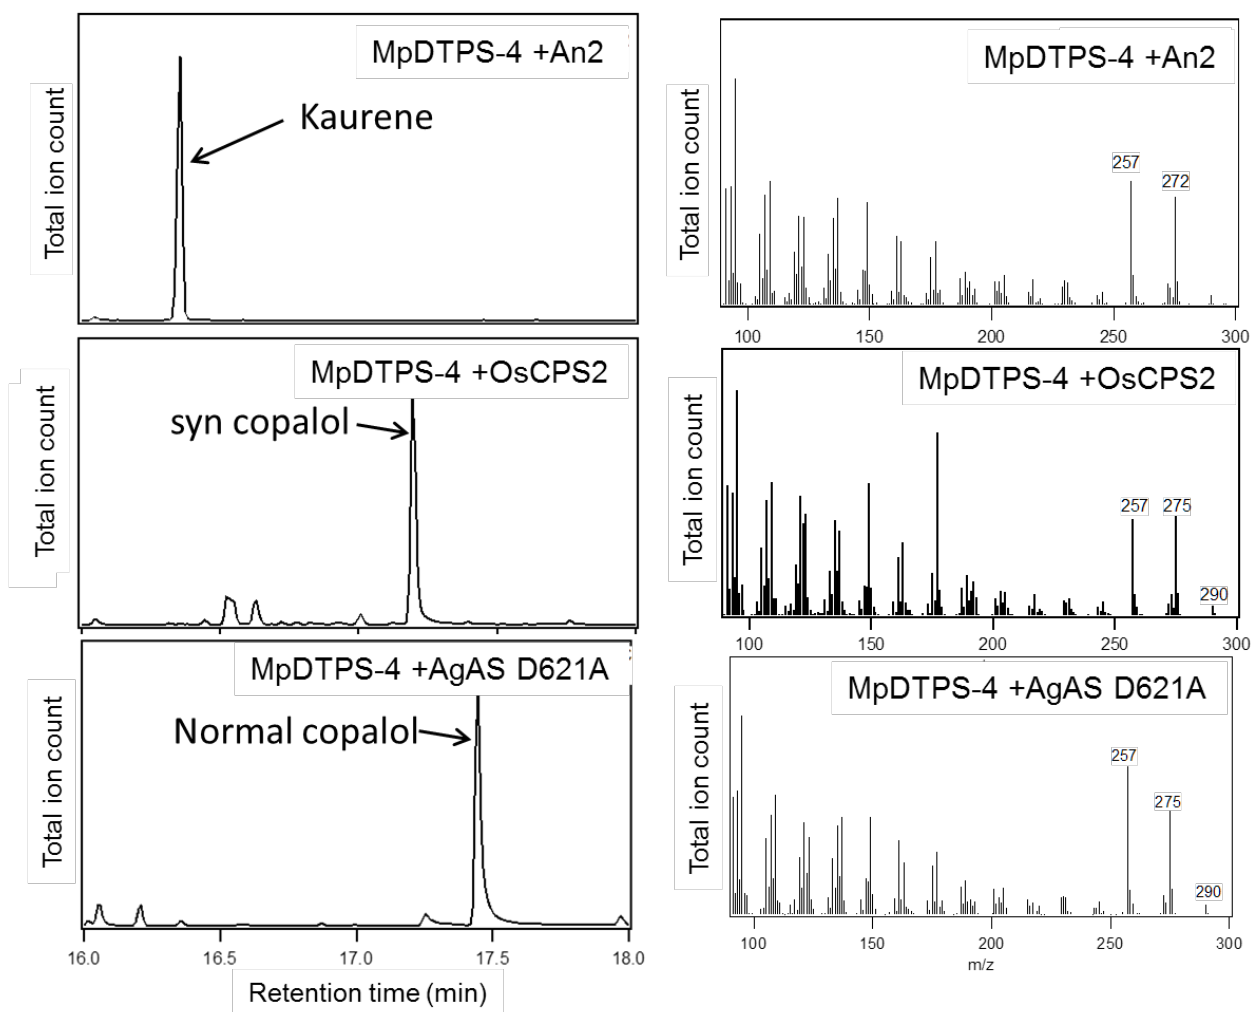

**Supplemental Figure 15.** GC-MS analysis of diterpene products generated by co-expression of MpDTPS4, GGPP synthase plus An2 or OsCPS2 or AgAS D621A, which are copalyl diphosphate synthases (CPS) that produce *ent*, *syn* and normal CPP from GGPP, respectively.

MpDTPS4 reacts with *ent*-CPP to form *ent*-kaurene when co-expressed with An2 from maize, while it remains largely unreactive with *syn* and normal CPP as indicated by unreacted *syn* and normal copalol, respectively when co-expressed with OsCPS2 or AgAS D621.

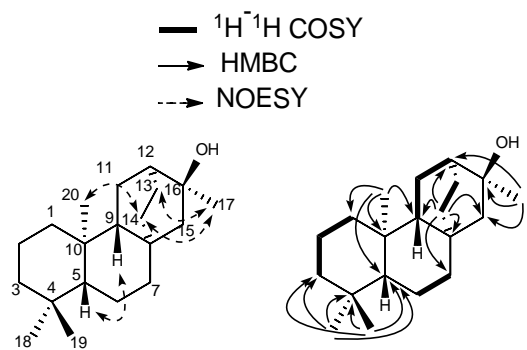

**Supplemental Figure 16.** Numbering and selected  $^1\text{H}$ - $^1\text{H}$  COSY, HMBC and NOESY correlations for atiseranol.



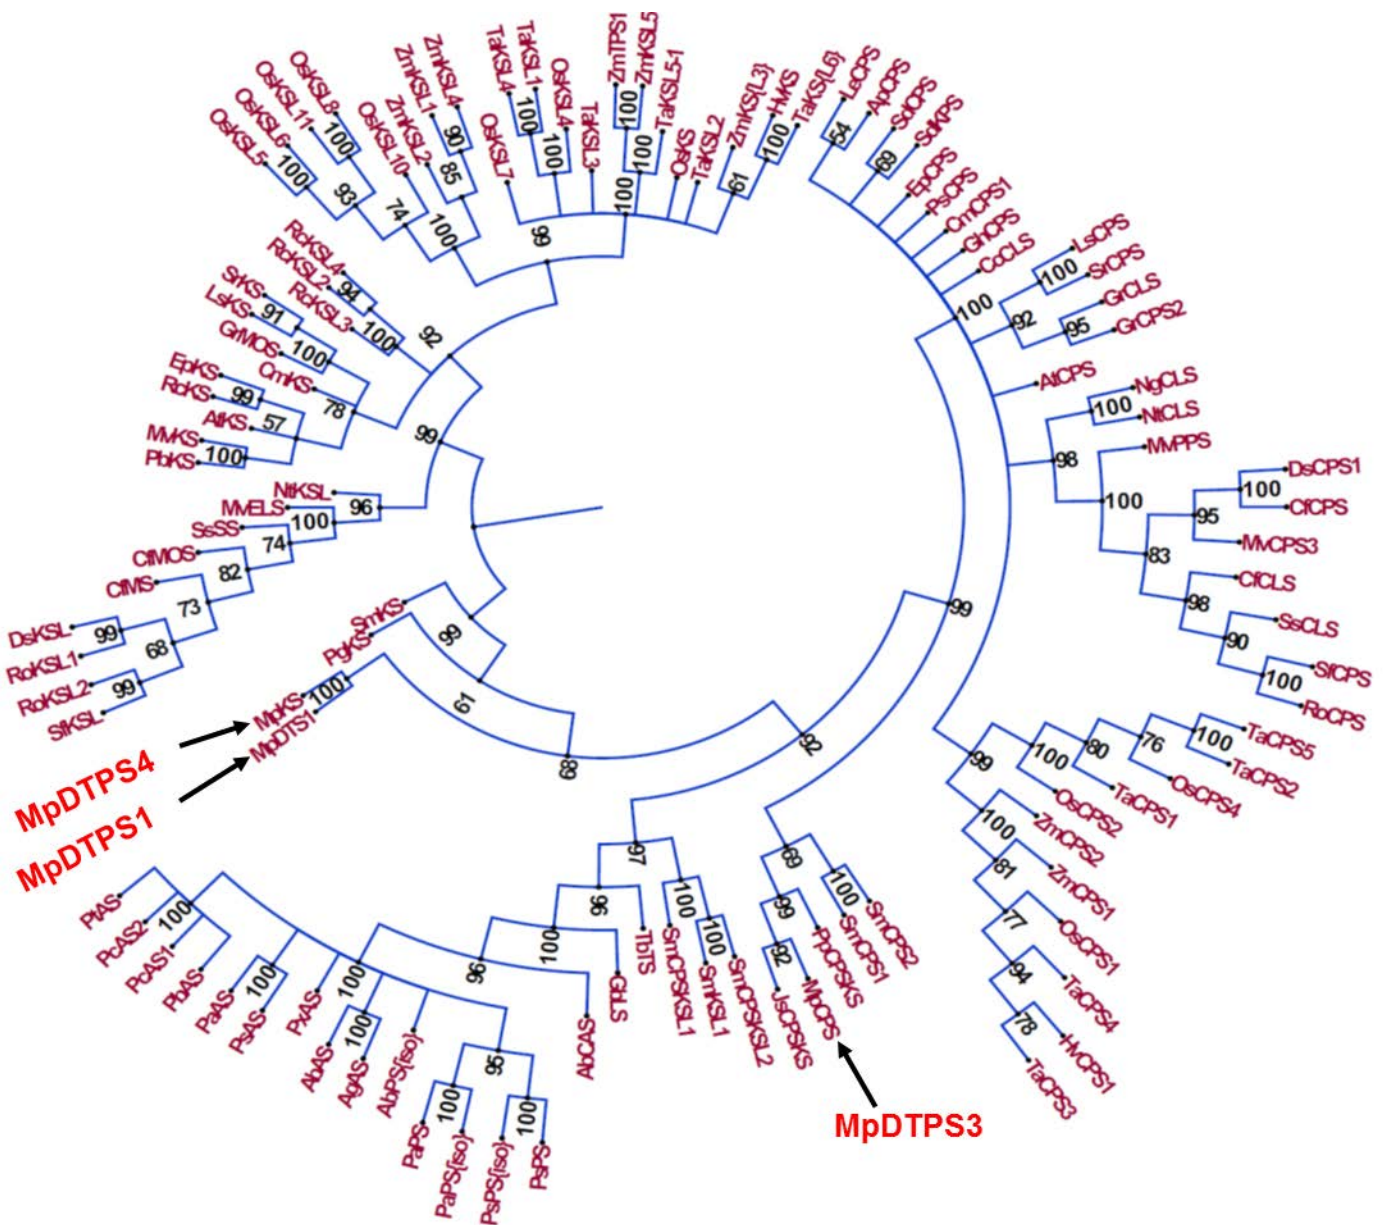

**Supplemental Figure 17.** Phylogenetic relationships of MpDTPS1, 3 and 4 to other plant mono-functional CPSs and KSs and a bifunctional KS from *Physcomitrella* as inferred using the Neighbor-Joining method (Saitou and Nei, 1987).

The *Marchantia* diterpene synthases (MpDTPS) phylogenetic tree was constructed based on the amino acid alignment presented in Supplemental Data Set 3. These terpene synthase sequences were downloaded from BLASTP search analysis tool at NCBI (Altschul et. al. 1997). Sequences for mono-functional CPSs and KSs and a bi-functional KS from *Physcomitrella* were selected based on sequence similarities. The multiple

sequence alignment was performed with the amino acid sequences of the 107 selected genes (including *M. polymorpha* diterpene synthase genes) using a commercially available MacVector program with default parameters (Rastogi, 2000) (Supplemental Data Set 3), and the phylogenetic tree was built using MEGA 6.0 (Tamura et al., 2013). The parameters used were Poisson model as substitution model with uniform rates and complete deletion for gaps or missing data. The bootstrap consensus tree inferred from 1000 replicates is taken to represent the evolutionary history of the taxa analyzed (Felsenstein, 1985). The percentage of replicate trees in which the associated taxa clustered together in the bootstrap test (1000 replicates) are shown next to the branches. Branches corresponding to partitions reproduced in less than 50% of the bootstrap replicates were collapsed via the program algorithm, and the tree was visualized with FigTree version 1.4.2 (<http://tree.bio.ed.ac.uk/software/figtree/>).

Altschul, S.F. Madden, T.L. Schäffer, A.A. Zhang, J. Zhang, Z. Miller, W. and Lipman, D.J. (1997) Gapped BLAST and PSI-BLAST: a new generation of protein database search programs. *Nucleic Acids Res.* 25: 3389-3402.

Felsenstein, J. (1985). Confidence limits on phylogenies: An approach using the bootstrap. *Evolution* 39: 783–791.

Rastogi, P.A. (2000). MacVector. Integrated sequence analysis for the Macintosh. *Methods Mol Biol.* 132: 47-69.

Saitou, N. and Nei, M. (1987). The neighbor-joining method: A new method for reconstructing phylogenetic trees. *Molecular Biology and Evolution* 4: 406-425.

Tamura, K., Stecher, G., Peterson, D., Filipski, A., and Kumar, S. (2013). MEGA6: Molecular evolutionary genetics analysis version 6.0. *Mol. Biol. Evol.* 30: 2725–2729.

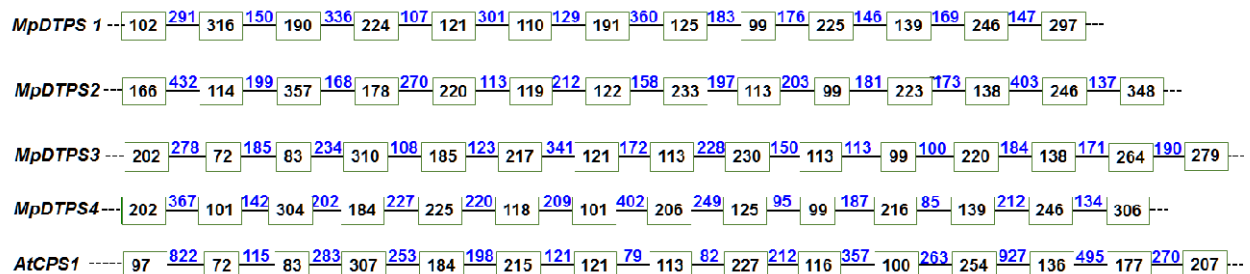

**Supplemental Figure 18.** Intron-exon organization of *MpDTPS1* to *4* in comparison to a typical mono-functional diterpene synthase (CPS) found in *Arabidopsis* (AT4g02780) (Sun and Kamiya, 1994).

The data is based on in silico analysis of *M. polymorpha* genomic sequences available in the NCBI SRA database in comparison to the assembled transcriptome of *M. polymorpha*. The SRA data was downloaded and assembled in the CLC work bench ver. 4.7 as discussed earlier in case of our transcriptome assembly.

Sun, T.P. and Kamiya, Y. (1994) The *Arabidopsis GA1* locus encodes the cyclase *ent*-kaurene synthetase A of gibberellin biosynthesis. *Plant Cell* 6: 1509–1518.

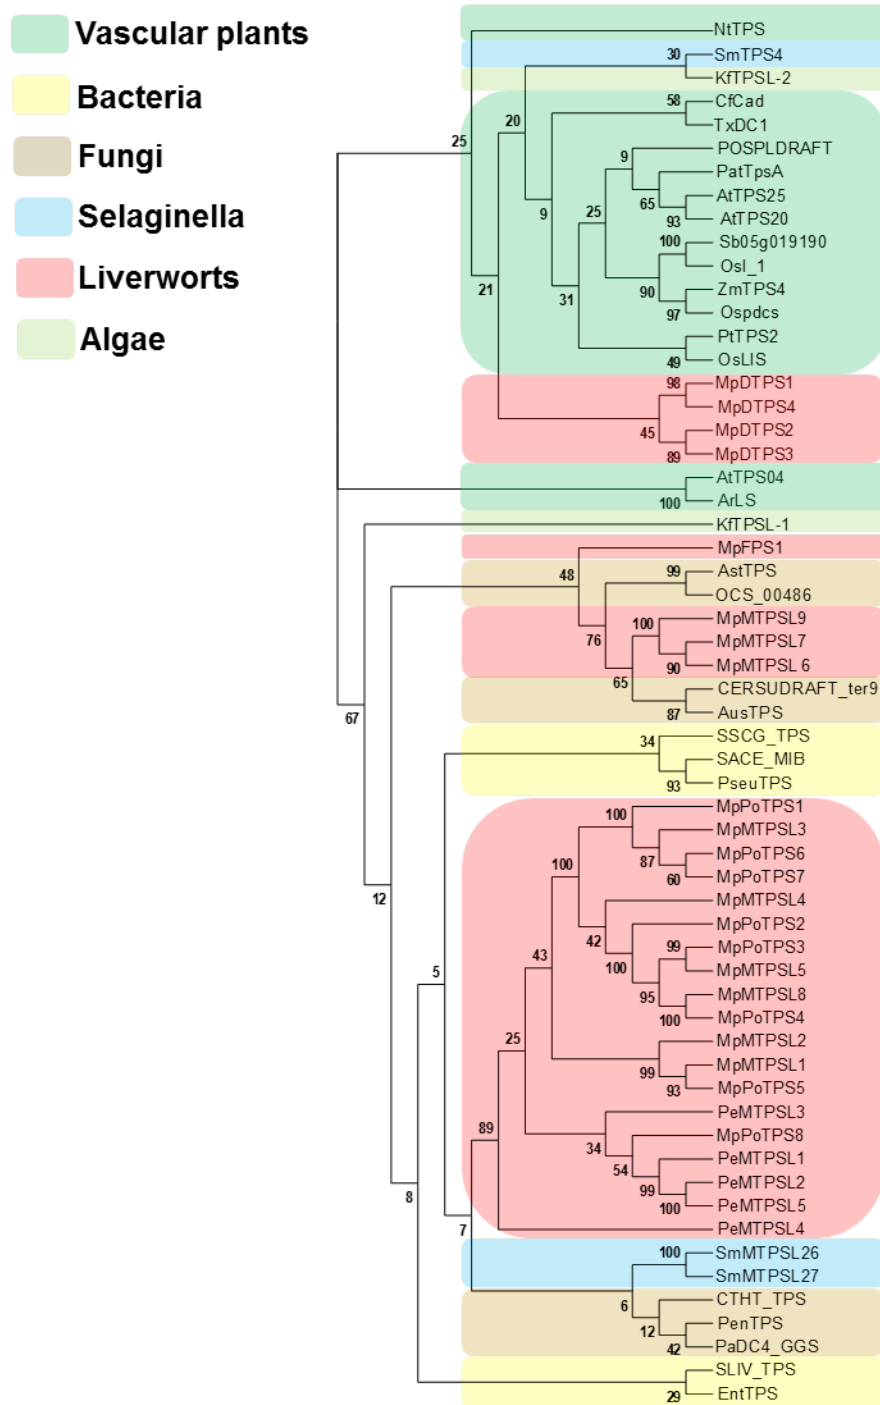

**Supplemental Figure 19.** Phylogenetic analysis of the terpene synthase-like and diterpene synthase-like proteins from *M. polymorpha* in relationship to bacterial, fungal and plant terpene synthase proteins (see Supplemental Data Sets 2 and 4).

Maximum likelihood phylogenetic tree analyses were performed with 59 amino acid sequences (see Supplementary Data Set 4) aligned across 285 positions. The terpene synthase sequences used include some sequences obtained from another liverwort (*Pellia endiviifolia*) transcriptome (Alaba et al., 2015), which have not been functionally

verified, plus validated terpene synthases from select bacteria and fungi, and examples across the evolutionary spectrum of plants based on the sequence similarity network (Figure 9). The maximum likelihood tree was generated using PhyML program interface in Seaview 4.0 (Gouy et al. 2010). Selection of best fit model was based on results provided by the Prottest server (Abascal et al 2005). The parameters used to generate the consensus phylogenetic tree were BIONJ as the starting tree (Gascuel 1997), using the LG substitution model with the four rate of substitution categories, estimated gamma distribution parameter and 1000 bootstrap repetitions. Bootstrap values are shown on each branches as percentage of replicates associated with end-point sequence clusters. The annotation of genes isolated from different organisms is shaded by different colors.

Abascal, F., Zardoya, R., and Posada, D. (2005). ProtTest: Selection of best-fit models of protein evolution. *Bioinformatics* 21: 2104–2105.

Alaba, S., et al. (2015). The liverwort *Pellia endiviifolia* shares microtranscriptomic traits that are common to green algae and land plants. *New Phytol.* 206: 352–367.

Gascuel, O. (1997). BIONJ: an improved version of the NJ algorithm based on a simple model of sequence data. *Mol. Biol. Evol.* 14: 685–695.

Gouy, M., Guindon, S., and Gascuel, O. (2010). SeaView version 4: A multiplatform graphical user interface for sequence alignment and phylogenetic tree building. *Mol. Biol. Evol.* 27: 221–224.

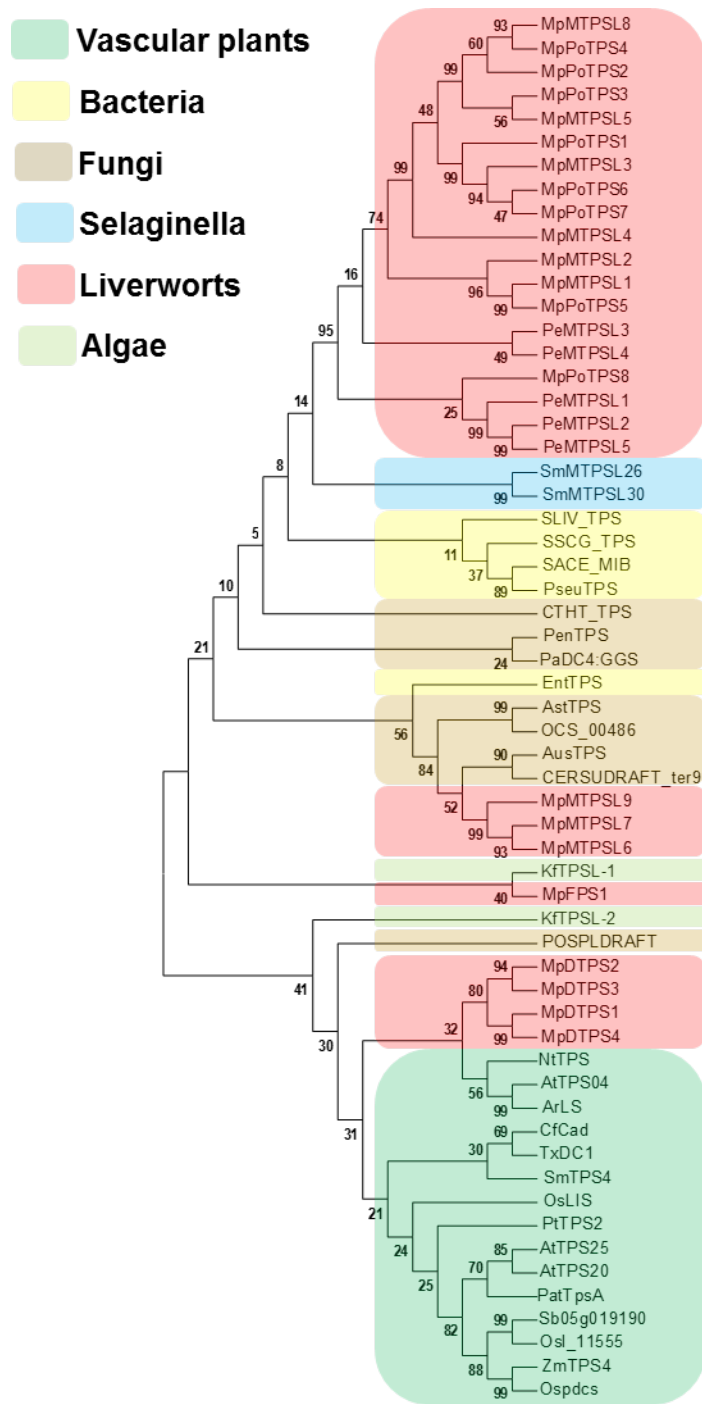

**Supplemental Figure 20.** Evolutionary relationships of *Marchantia* terpenes synthase proteins to other terpene synthase proteins presented in Supplemental Data Sets 2 and 4.

The evolutionary history was inferred using the Neighbor-Joining method (Saitou and Nei, 1987). The optimal tree with the sum of branch length = 39.98543631 is shown. The percentage of replicate trees in which the associated taxa clustered together in the bootstrap test (5000 replicates) are shown next to the branches (Felsenstein 1985). The

evolutionary distances were computed using the Poisson correction method (Zuckerandl and Pauling, 1965) and are in units of the number of amino acid substitutions per site. The rate variation among sites was modeled with a gamma distribution (shape parameter = 5). The analysis involved 59 amino acid sequences. All ambiguous positions were removed for each sequence pair. There were a total of 285 positions in the final Supplemental Data Set 4. Evolutionary analyses were conducted in MEGA7 (Kumar et al., 2016).

Felsenstein J. (1985). Confidence limits on phylogenies: An approach using the bootstrap. *Evolution* 39:783-791.

Kumar S., Stecher G., and Tamura K. (2015). MEGA7: Molecular Evolutionary Genetics Analysis version 7.0 for bigger datasets. *Mol. Biol. Evol.* 33: 1870–1874.

Saitou N. and Nei M. (1987). The neighbor-joining method: A new method for reconstructing phylogenetic trees. *Molecular Biology and Evolution* 4:406-425.

Zuckerandl E. and Pauling L. (1965). Evolutionary divergence and convergence in proteins. Edited in *Evolving Genes and Proteins* by V. Bryson and H.J. Vogel, pp. 97-166. Academic Press, New York.

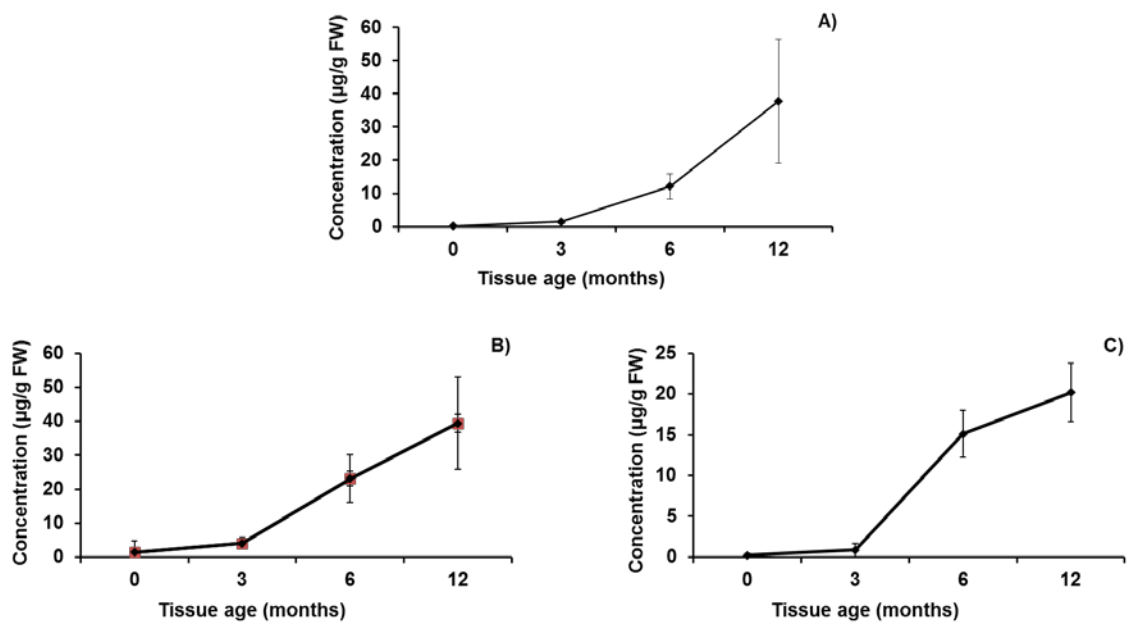

**Supplemental Figure 21.** Developmental time course for the amounts of the major MpMTPSL4 products found in *M. polymorpha*.

Major MpMTPSL4 products measured during the development of *M. polymorpha*. (-)- $\alpha$ -Gurjunene is the major hydrocarbon produced by MpMTPSL4 (A). The time courses for the changes in the abundance of two suspected sesquiterpene alcohols found in *M. polymorpha* and produced by MpMTPSL4 are also shown: 2.097169583 (relative retention time (RRT) to dodecane standard) (B) and 2.192242561 (RRT to dodecane standard) (C).

## SUPPLEMENTAL TABLES

**Supplemental Table 1.** TBLASTN search of *Marchantia* transcriptome database (42,617 contigs) using archetypical mono- and sesqui-terpene synthases. Hits to *M. polymorpha* genes are noted in bold.

| Query                                                                                                | Hits in <i>M. polymorpha</i> transcriptomic database                                                                                        | E-value  | Score | Gaps (%) |
|------------------------------------------------------------------------------------------------------|---------------------------------------------------------------------------------------------------------------------------------------------|----------|-------|----------|
| Beta-cubebene synthase [ <i>Magnolia grandiflora</i> ] gb ACC66281.1                                 | MHA_AA_NoIndex_L006_R1_001_pf(pair ed)contig26612DeNovoAssembly ( <b>MpDTPS3</b> )                                                          | 8.35E-36 | 362   | 8        |
|                                                                                                      | MHA_AA_NoIndex_L006_R1_001_pf(pair ed)contig9617DeNovoAssembly ( <b>MpDTPS4</b> )                                                           | 8.47E-34 | 345   | 8        |
|                                                                                                      | MHA_AA_NoIndex_L006_R1_001_pf(pair ed)contig7218DeNovoAssembly ( <b>MpDTPS1</b> )                                                           | 1.46E-30 | 319   | 8        |
|                                                                                                      | MHA_AA_NoIndex_L006_R1_001_pf(pair ed)contig27100DeNovoAssembly (contig shows similarity to diterpene synthase from <i>Abies balsamea</i> ) | 7.92E-25 | 270   | 11       |
|                                                                                                      | MHA_AA_NoIndex_L006_R1_001_pf(pair ed)contig6926DeNovoAssembly ( <b>MpDTPS2</b> )                                                           | 1.33E-22 | 254   | 12       |
| AtTPS11 (Thujopsene synthase or Alpha-barbatene synthase [ <i>Arabidopsis thaliana</i> ] gb Q4KSH9.2 | MHA_AA_NoIndex_L006_R1_001_pf(pair ed)contig27100DeNovoAssembly(conti g shows similarity to diterpene synthase from <i>Abies balsamea</i> ) | 5.84E-20 | 231   | 9        |
|                                                                                                      | MHA_AA_NoIndex_L006_R1_001_pf(pair ed)contig7218DeNovoAssembly ( <b>MpDTPS1</b> )                                                           | 4.59E-12 | 168   | 13       |
|                                                                                                      | MHA_AA_NoIndex_L006_R1_001_pf(pair ed)contig9617DeNovoAssembly ( <b>MpDTPS4</b> )                                                           | 7.25E-11 | 157   | 12       |



|  |                                                                                          |          |     |    |
|--|------------------------------------------------------------------------------------------|----------|-----|----|
|  | MHA_AA_NoIndex_L006_R1_001_pf(pa<br>ired)contig26612DeNovoAssembly<br>( <b>MpDTPS3</b> ) | 4.38E-08 | 134 | 12 |
|  | MHA_AA_NoIndex_L006_R1_001_pf(pa<br>ired)contig6926DeNovoAssembly<br>( <b>MpDTPS2</b> )  | 5.77E-04 | 99  | 14 |

|                                                                                                      |                                                                                                                                                                                 |          |     |    |
|------------------------------------------------------------------------------------------------------|---------------------------------------------------------------------------------------------------------------------------------------------------------------------------------|----------|-----|----|
| Santalene and<br>bergamotene<br>synthase<br>[ <i>Solanum<br/>habrochaites</i> ]<br>gb ACJ38409.<br>1 | MHA_AA_NoIndex_L006_R1_001_pf(pa<br>ired)contig26612DeNovoAssembly<br>( <b>MpDTPS3</b> )                                                                                        | 7.48E-81 | 720 | 6  |
|                                                                                                      | MHA_AA_NoIndex_L006_R1_001_pf(pa<br>ired)contig6926DeNovoAssembly<br>( <b>MpDTPS2</b> )                                                                                         | 7.51E-68 | 616 | 7  |
|                                                                                                      | MHA_AA_NoIndex_L006_R1_001_pf(pa<br>ired)contig7218DeNovoAssembly<br>( <b>MpDTPS1</b> )                                                                                         | 4.04E-62 | 578 | 9  |
|                                                                                                      | MHA_AA_NoIndex_L006_R1_001_pf(pa<br>ired)contig9617DeNovoAssembly<br>( <b>MpDTPS4</b> )                                                                                         | 3.69E-55 | 521 | 9  |
|                                                                                                      | MHA_AA_NoIndex_L006_R1_001_pf(pa<br>ired)contig27745DeNovoAssembly<br>(contig similar to copalyl diphosphate<br>synthase [ <i>Taiwania cryptomerioides</i> ]<br>gb AFE61356.1 ) | 1.15E-23 | 258 | 13 |
|                                                                                                      | MHA_AA_NoIndex_L006_R1_001_pf(pa<br>ired)contig27100DeNovoAssembly<br>(contig similar to<br>levopimaradiene/abietadiene synthase<br>[ <i>Picea abies</i> ] gb AAS47691.1 )      | 5.00E-21 | 241 | 8  |
| 4S-limonene<br>synthase<br>[ <i>Mentha<br/>spicata</i> ]<br>gb AAC37366.<br>1                        | MHA_AA_NoIndex_L006_R1_001_pf(pa<br>ired)contig26612DeNovoAssembly<br>( <b>MpDTPS3</b> )                                                                                        | 1.58E-38 | 385 | 7  |
|                                                                                                      | MHA_AA_NoIndex_L006_R1_001_pf(pa<br>ired)contig9617DeNovoAssembly<br>( <b>MpDTPS4</b> )                                                                                         | 5.64E-35 | 356 | 8  |

|                                                                                              |                                                                                                                                                                            |          |     |    |
|----------------------------------------------------------------------------------------------|----------------------------------------------------------------------------------------------------------------------------------------------------------------------------|----------|-----|----|
|                                                                                              | MHA_AA_NoIndex_L006_R1_001_pf(pa<br>ired)contig7218DeNovoAssembly<br>( <b>MpDTPS1</b> )                                                                                    | 3.20E-33 | 342 | 9  |
|                                                                                              | MHA_AA_NoIndex_L006_R1_001_pf(pa<br>ired)contig27100DeNovoAssembly<br>(contig similar to<br>levopimaradiene/abietadiene synthase<br>[ <i>Picea abies</i> ] gb AAS47691.1 ) | 4.20E-31 | 320 | 9  |
|                                                                                              | MHA_AA_NoIndex_L006_R1_001_pf(pa<br>ired)contig6926DeNovoAssembly<br>( <b>MpDTPS2</b> )                                                                                    | 6.08E-23 | 258 | 10 |
|                                                                                              | MHA_AA_NoIndex_L006_R1_001_pf(pa<br>ired)contig6926DeNovoAssembly<br>( <b>MpDTPS2</b> )                                                                                    | 6.08E-23 | 258 | 10 |
|                                                                                              |                                                                                                                                                                            |          |     |    |
| (+) -<br>germacrene D<br>synthase<br>[ <i>Solidago<br/>canadensis</i> ]<br>gb AAR31144.<br>1 | MHA_AA_NoIndex_L006_R1_001_pf(pa<br>ired)contig26612DeNovoAssembly<br>( <b>MpDTPS3</b> )                                                                                   | 4.11E-37 | 372 | 8  |
|                                                                                              | MHA_AA_NoIndex_L006_R1_001_pf(pa<br>ired)contig9617DeNovoAssembly<br>( <b>MpDTPS4</b> )                                                                                    | 1.10E-24 | 271 | 10 |
|                                                                                              | MHA_AA_NoIndex_L006_R1_001_pf(pa<br>ired)contig27100DeNovoAssembly<br>(contig similar to<br>levopimaradiene/abietadiene synthase<br>[ <i>Picea abies</i> ] gb AAS47691.1 ) | 2.31E-23 | 259 | 10 |
|                                                                                              | MHA_AA_NoIndex_L006_R1_001_pf(pa<br>ired)contig7218DeNovoAssembly<br>( <b>MpDTPS1</b> )                                                                                    | 2.43E-20 | 236 | 10 |
|                                                                                              | MHA_AA_NoIndex_L006_R1_001_pf(pa<br>ired)contig6926DeNovoAssembly<br>( <b>MpDTPS2</b> )                                                                                    | 7.38E-18 | 215 | 13 |
| 5EAS_TOBA<br>C 5-epi-<br>aristolochene                                                       | MHA_AA_NoIndex_L006_R1_001_pf(pa<br>ired)contig26612DeNovoAssembly<br>( <b>MpDTPS3</b> )                                                                                   | 3.62E-39 | 389 | 12 |

|                                                                          |                                                                                                                                                                            |          |     |    |
|--------------------------------------------------------------------------|----------------------------------------------------------------------------------------------------------------------------------------------------------------------------|----------|-----|----|
| synthase<br>sp Q40577                                                    | MHA_AA_NoIndex_L006_R1_001_pf(pa<br>ired)contig9617DeNovoAssembly<br><b>(MpDTPS4)</b>                                                                                      | 6.33E-30 | 313 | 10 |
|                                                                          | MHA_AA_NoIndex_L006_R1_001_pf(pa<br>ired)contig27100DeNovoAssembly<br>(contig similar to<br>levopimaradiene/abietadiene synthase<br>[ <i>Picea abies</i> ] gb AAS47691.1 ) | 1.95E-24 | 267 | 8  |
|                                                                          | MHA_AA_NoIndex_L006_R1_001_pf(pa<br>ired)contig7218DeNovoAssembly<br><b>(MpDTPS1)</b>                                                                                      | 4.73E-23 | 258 | 8  |
|                                                                          | MHA_AA_NoIndex_L006_R1_001_pf(pa<br>ired)contig6926DeNovoAssembly<br><b>(MpDTPS2)</b>                                                                                      | 5.14E-17 | 208 | 13 |
|                                                                          |                                                                                                                                                                            |          |     |    |
| VTSS1_HYO<br>MU<br>Vetispiradiene<br>synthase 1<br>(HVS1)<br>sp Q39978.2 | MHA_AA_NoIndex_L006_R1_001_pf(pa<br>ired)contig26612DeNovoAssembly                                                                                                         | 1.21E-42 | 418 | 8  |
|                                                                          | MHA_AA_NoIndex_L006_R1_001_pf(pa<br>ired)contig9617DeNovoAssembly<br><b>(MpDTPS4)</b>                                                                                      | 2.29E-33 | 341 | 7  |
|                                                                          | MHA_AA_NoIndex_L006_R1_001_pf(pa<br>ired)contig7218DeNovoAssembly<br><b>(MpDTPS1)</b>                                                                                      | 4.77E-28 | 299 | 8  |
|                                                                          | MHA_AA_NoIndex_L006_R1_001_pf(pa<br>ired)contig27100DeNovoAssembly<br>(contig similar to<br>levopimaradiene/abietadiene synthase<br>[ <i>Picea abies</i> ] gb AAS47691.1 ) | 7.74E-28 | 294 | 7  |
|                                                                          | MHA_AA_NoIndex_L006_R1_001_pf(pa<br>ired)contig6926DeNovoAssembly<br><b>(MpDTPS2)</b>                                                                                      | 2.37E-17 | 211 | 12 |

**Supplemental Table 2.** Pfam domain search of the *M. polymorpha* assembled contigs with PF01397.

The assembled contigs for *M. polymorpha* were translated using the six frame translation module within Geneious (Geneious Pro v5.5 created by Biomatters; available from <http://www.geneious.com>). The six frame translated sequences were then screened for the Pfam PF01397 domain using HMMER3.0 ([www.hmmer.janelia.org](http://www.hmmer.janelia.org)).

| No. | Contig identified                                                    | PFAM Domain Used | HMM cut off E-value | Top hit BLATSX (NCBI)                                                            | E-value  | Gene Cloned                |
|-----|----------------------------------------------------------------------|------------------|---------------------|----------------------------------------------------------------------------------|----------|----------------------------|
| 1   | MHA_AA_NoIndex_L006_R1_001_pf_(paired)_contig_26612_De_Novo_Assembly | PF01397          | 10.0                | BAJ39816.1 entkaurene synthase [ <i>Jungermannia subulata</i> ] Length: 886      | 0        | MpDTPS3                    |
| 2   | MHA_AA_NoIndex_L006_R1_001_pf_(paired)_contig_7218_De_Novo_Assembly  | PF01397          | 10.0                | BAJ39816.1 entkaurene synthase [ <i>Jungermannia subulata</i> ] Length: 886      | 5E-133   | MpDTPS1                    |
| 3   | MHA_AA_NoIndex_L006_R1_001_pf_(paired)_contig_9617_De_Novo_Assembly  | PF01397          | 10.0                | ADB55710.1 (-)-entkaurene synthase [ <i>Picea sitchensis</i> ] Length: 757       | 8E-116   | MpDTPS4                    |
| 4   | MHA_AA_NoIndex_L006_R1_001_pf_(paired)_contig_6926_De_Novo_Assembly  | PF01397          | 10.0                | BAJ39816.1 entkaurene synthase [ <i>Jungermannia subulata</i> ] Length: 886      | 0        | MpDTPS2                    |
| 5   | MHA_AA_NoIndex_L006_R1_001_pf_(paired)_contig_27100_De_Novo_Assembly | PF01397          | 10.0                | AEL99951.1 diterpene synthase TPS2, partial [ <i>Abies balsamea</i> ] Length=852 | 3.00E-92 | Partial (5' missing)       |
| 6   | MHA_AA_NoIndex_L006_R1_001_pf_(paired)_contig_27745_De_Novo_Assembly | PF01397          | 10.0                | BAJ39816.1 entkaurene synthase [ <i>Jungermannia subulata</i> ] Length=886       | 1.00E-74 | Partial (5' and 3'missing) |

**Supplemental Table 3.** Pfam domain search of the *M. polymorpha* assembled contigs with PF03936.

The assembled contigs for *M. polymorpha* were translated using the six frame translation module within Geneious (Geneious Pro v5.5 created by Biomatters; available from <http://www.geneious.com>). The six frame translated sequences were then screened for the Pfam PF03936 domain using HMMER3.0 ([www.hmmerr.janelia.org](http://www.hmmerr.janelia.org)).

| No. | Contig identified                                                    | Pfam domain used | HMM cut off E-value | Top hit BLATSX (NCBI)                                                             | E-value  | Gene status          |
|-----|----------------------------------------------------------------------|------------------|---------------------|-----------------------------------------------------------------------------------|----------|----------------------|
| 1   | MHA_AA_NoIndex_L006_R1_001_pf_(paired)_contig_9617_De_Novo_Assembly  | PF03936          | 10                  | ADB55710.1 (-)-ent-kaurene synthase [ <i>Picea sitchensis</i> ] Length: 757       | 8E-116   | MpDTPS4              |
| 2   | MHA_AA_NoIndex_L006_R1_001_pf_(paired)_contig_26612_De_Novo_Assembly | PF03936          | 10                  | BAJ39816.1 ent-kaurene synthase [ <i>Jungermannia subulata</i> ] Length: 886      | 0        | MpDTPS3              |
| 3   | MHA_AA_NoIndex_L006_R1_001_pf_(paired)_contig_7218_De_Novo_Assembly  | PF03936          | 10                  | BAJ39816.1 ent-kaurene synthase [ <i>Jungermannia subulata</i> ] Length: 886      | 5E-133   | MpDTPS1              |
| 4   | MHA_AA_NoIndex_L006_R1_001_pf_(paired)_contig_27100_De_Novo_Assembly | PF03936          | 10                  | AEL99951.1 diterpene synthase TPS2, partial [ <i>Abies balsamea</i> ]= length 852 | 3.00E-92 | Partial (5' missing) |
| 5   | MHA_AA_NoIndex_L006_R1_001_pf_(paired)_contig_6926_De_Novo_Assembly  | PF03936          | 10                  | BAJ39816.1 ent-kaurene synthase [ <i>Jungermannia subulata</i> ] Length: 886      | 0        | MpDTPS2              |
| 6   | MHA_AA_NoIndex_L006_R1_001_pf_(paired)_contig_27182_De_Novo_Assembly | PF03936          | 10                  | WP_019432975.1 hypothetical protein [ <i>Streptomyces</i> sp. AA0539] Length: 351 | 2.00E-19 | MpMTPSL1             |
| 7   | MHA_AA_NoIndex_L006_R1_001_pf_(paired)_contig_9911_De_Novo_Assembly  | PF03936          | 10                  | WP_006971626.1 Terpene synthase, metal-binding protein [ <i>Plesiocystis</i>      | 8.00E-11 | MpMTPSL2             |

|    |                                                                                  |         |    |                                                                                                                                                       |              |          |
|----|----------------------------------------------------------------------------------|---------|----|-------------------------------------------------------------------------------------------------------------------------------------------------------|--------------|----------|
|    |                                                                                  |         |    | <i>pacifica</i> ] Length:<br>355                                                                                                                      |              |          |
| 8  | MHA_AA_NoIndex_L<br>006_R1_001_pf_(pai<br>red)_contig_9134_De<br>_Novo_Assembly  | PF03936 | 10 | YP_006807783.1<br>terpene synthase<br>metal-binding<br>domain-containing<br>protein [ <i>Nocardia<br/>brasiliensis</i> ATCC<br>700358] Length:<br>755 | 2.00E-<br>16 | MpMTPSL4 |
| 9  | MHA_AA_NoIndex_L<br>006_R1_001_pf_(pai<br>red)_contig_29158_D<br>e_Novo_Assembly | PF03936 | 10 | gb ACU62166.1 <br>Terpene synthase<br>metal-binding<br>domain protein<br>[ <i>Chitinophaga<br/>pinensis</i> DSM<br>2588]Length=321                    | 1.00E-<br>10 | MpMTPSL5 |
| 10 | MHA_AA_NoIndex_L<br>006_R1_001_pf_(pai<br>red)_contig_14438_D<br>e_Novo_Assembly | PF03936 | 10 | gb EGO28715.1 <br>putative terpene<br>cyclase [ <i>Serpula<br/>lacrymans</i> var.<br>lacrymans<br>S7.9]Length=342                                     | 5.00E-<br>06 | MpMTPSL8 |
| 11 | MHA_AA_NoIndex_L<br>006_R1_001_pf_(pai<br>red)_contig_27591_D<br>e_Novo_Assembly | PF03936 | 10 | Geosmin synthase<br>[ <i>Streptomyces</i> sp.<br>LaPpAH-95]<br>WP_018102933.1L<br>ength: 737                                                          | 7.00E-<br>13 | MpMTPSL3 |

**Supplemental Table 4.** Pfam domain search of the *M. polymorpha* assembled contigs with PF06330.

The assembled contigs for *M. polymorpha* were translated using the six frame translation module within Geneious (Geneious Pro v5.5 created by Biomatters; available from <http://www.geneious.com>). The six frame translated sequences were then screened for the Pfam PF06330 domain using HMMER3.0 ([www.hmmerr.janelia.org](http://www.hmmerr.janelia.org)).

| No. | Contig identified                                                    | Pfam domain used | HMM cut off E-value | Top hit BLATSX (NCBI)                                                                                                           | E-value        | Putative gene name assigned |
|-----|----------------------------------------------------------------------|------------------|---------------------|---------------------------------------------------------------------------------------------------------------------------------|----------------|-----------------------------|
| 1   | MHA_AA_NoIndex_L006_R1_001_pf_(paired)_contig_13913_De_Novo_Assembly | PF06330          | 10                  | trichodiene synthase [ <i>Fusarium sambucinum</i> ] ACZ56400.1 Length: 247                                                      | 7.00E-15       | MpMTPSL7                    |
| 2   | MHA_AA_NoIndex_L006_R1_001_pf_(paired)_contig_17864_De_Novo_Assembly | PF06330          | 10                  | XP_002474149.1 predicted protein [ <i>Postia placenta</i> Mad-698-R] Length: 305                                                | XP_002474149.1 | MpMTPSL6                    |
| 3   | MHA_AA_NoIndex_L006_R1_001_pf_(paired)_contig_9134_De_Novo_Assembly  | PF06330          | 10                  | YP_006807783.1 terpene synthase metal-binding domain-containing protein [ <i>Nocardia brasiliensis</i> ATCC 700358] Length: 755 | 2.00E-16       | MpMTPSL4                    |
| 4   | MHA_AA_NoIndex_L006_R1_001_pf_(paired)_contig_27182_De_Novo_Assembly | PF06330          | 10                  | WP_019432975.1 hypothetical protein [ <i>Streptomyces</i> sp. AA0539] Length: 351                                               | 2.00E-19       | MpMTPSL1                    |
| 5   | MHA_AA_NoIndex_L006_R1_001_pf_(paired)_contig_27591_De_Novo_Assembly | PF06330          | 10                  | Geosmin synthase [ <i>Streptomyces</i> sp. LaPpAH-95] WP_018102933.1 Length: 737                                                | 7.00E-13       | MpMTPSL3                    |
| 6   | MHA_AA_NoIndex_L006_R1_001_pf_(paired)_contig_9911_De_Novo_Assembly  | PF06330          | 10                  | WP_006971626.1 Terpene synthase, metal-binding protein [ <i>Plesiocystis pacifica</i> ] Length: 355                             | 8.00E-11       | MpMTPSL2                    |

|   |                                                                      |         |    |                                                                                                                 |          |          |
|---|----------------------------------------------------------------------|---------|----|-----------------------------------------------------------------------------------------------------------------|----------|----------|
| 7 | MHA_AA_NoIndex_L006_R1_001_pf_(paired)_contig_29158_De_Novo_Assembly | PF06330 | 10 | gb ACU62166.1  Terpene synthase metal-binding domain protein [ <i>Chitinophaga pinensis</i> DSM 2588]Length=321 | 1.00E-10 | MpMTPSL5 |
| 8 | MHA_AA_NoIndex_L006_R1_001_pf_(paired)_contig_14438_De_Novo_Assembly | PF06330 | 10 | gb EGO28715.1  putative terpene cyclase [ <i>Serpula lacrymans</i> var. <i>lacrymans</i> S7.9]Length=342        | 5.00E-06 | MpMTPSL8 |
| 9 | MHA_AA_NoIndex_L006_R1_001_pf_(paired)_contig_6926_De_Novo_Assembly  | PF06330 | 10 | BAJ39816.1 entkaurene synthase [ <i>Jungermannia subulata</i> ] Length: 886                                     | 0        | MpDTPS2  |



**Supplemental Table 5.** Summary of Pfam domain searches of the *M. polymorpha* transcriptome (45,309 contigs, assembled from the NCBI SRA database SRP029610 according to Sharma et al. 2013) for PF01397, PF03936, and PF06330 motifs.

| Contig number     | Top hit BLATSX (NCBI)                                                                                                       | E-value  | Assigned gene name |
|-------------------|-----------------------------------------------------------------------------------------------------------------------------|----------|--------------------|
| 12477             | WP_019432975.1 hypothetical protein [ <i>Streptomyces</i> sp. AA0539]                                                       | 2E-19    | MpMTPSL1           |
| 9798              | WP_006971626.1 Terpene synthase, metal-binding protein [ <i>Plesiocystis pacifica</i> ]                                     | 8E-11    | MpMTPSL2           |
| 4252, 4254, 30824 | Geosmin synthase [ <i>Streptomyces</i> sp. LaPpAH-95]<br>WP_018102933.1                                                     | 7E-13    | MpMTPSL3           |
| 2193, 18889       | YP_006807783.1 terpene synthase metal-binding domain-containing protein [ <i>Nocardia brasiliensis</i> ATCC 700358]         | 2E-16    | MpMTPSL4           |
| 9297, 16673       | gb ACU62166.1  Terpene synthase metal-binding domain protein [ <i>Chitinophaga pinensis</i> DSM 2588]                       | 1E-10    | MpMTPSL5           |
| 15918             | XP_002474149.1 predicted protein [ <i>Postia placenta</i> Mad-698-R]                                                        | 7E-11    | MpMTPSL6           |
| 8770, 16809       | trichodiene synthase [ <i>Fusarium sambucinum</i> ] ACZ56400.1                                                              | 7E-15    | MpMTPSL7           |
| 9297              | gb EGO28715.1  putative terpene cyclase [ <i>Serpula lacrymans</i> var. <i>lacrymans</i> S7.9]                              | 0.000005 | MpMTPSL8           |
| 18059             | Select seq gb ACU62166.1  Terpene synthase metal-binding domain protein [ <i>Chitinophaga pinensis</i> DSM 2588] ACU62166.1 | 7E-14    | Partial            |

|       |                                                                                                      |         |          |
|-------|------------------------------------------------------------------------------------------------------|---------|----------|
| 18987 | Trichodiene synthase [ <i>Penicillium expansum</i> ] KGO36747.1                                      | 3E-10   | MpMTPSL9 |
| 15161 | Similar to Trichodiene synthase; acc. no. Q6A1B7 [ <i>Pyronema omphalodes</i> CBS 100304] CCX30236.1 | 0.00001 | Partial  |

**Supplemental Table 6.** References sequences used for similarity and identity comparisons.

| Symbol            | Gene                                                                                                           | Accession    | References                    |
|-------------------|----------------------------------------------------------------------------------------------------------------|--------------|-------------------------------|
| <b>SmMTPSL1</b>   | hypothetical protein<br>SELMODRAFT_402353<br>[ <i>Selaginella moellendorffii</i> ]                             | XP_002960898 | Li et al. 2012                |
| <b>SmMTPSL17</b>  | hypothetical protein<br>SELMODRAFT_412756<br>[ <i>Selaginella moellendorffii</i> ]                             | XP_002971982 | Li et al. 2012                |
| <b>SmMTPSL26</b>  | hypothetical protein<br>SELMODRAFT_414571<br>[ <i>Selaginella moellendorffii</i> ]                             | XP_002974409 | Li et al. 2012                |
| <b>SmMTPSL22</b>  | hypothetical protein<br>SELMODRAFT_413294<br>[ <i>Selaginella moellendorffii</i> ]                             | XP_002972952 | Li et al. 2012                |
| <b>SmTPS9</b>     | kaurene synthase<br>[ <i>Selaginella moellendorffii</i> ]                                                      | XP_002960350 | Li et al. 2012                |
| <b>SmTPS10</b>    | terpene synthase, partial<br>[ <i>Selaginella moellendorffii</i> ]                                             | AFR34003     | Li et al. 2012                |
| <b>PhyTPS</b>     | ent-kaurene synthase<br>[ <i>Physcomitrella patens</i> ]                                                       | BAF61135     | Hayashi et al. 2006           |
| <b>TRI5_FUSSP</b> | sesquiterpene cyclase gene<br>from the trichothecene-<br>producing fungus <i>Fusarium<br/>sporotrichioides</i> | AAN05035     | Hohn and Beremand<br>1989     |
| <b>TASY_TAXBR</b> | taxadiene synthase [ <i>Taxus<br/>brevifolia</i> ]                                                             | AAC49310.1   | Wildung and<br>Croteau, 1996  |
| <b>TEAS</b>       | 5-epi-aristolochene<br>synthase                                                                                | Q40577       | Facchini and<br>Chappell 1992 |
| <b>PrAS</b>       | Aristolochene synthase                                                                                         | Q03471.1     | Proctor and Hohn,<br>1993     |
| <b>ScGS</b>       | cyclase [ <i>Streptomyces<br/>coelicolor</i> A3(2)]                                                            | NP_630182    | Hsiao and Kirby,<br>2008      |
| <b>MpMTPSL1</b>   | <i>Marchantia</i> Terpene<br>synthase like gene                                                                | KU664188     | This study                    |
| <b>MpMTPSL2</b>   | <i>Marchantia</i> Terpene<br>synthase like gene                                                                | KU664189     | This study                    |
| <b>MpMTPSL3</b>   | <i>Marchantia</i> Terpene<br>synthase like gene                                                                | KU664190     | This study                    |
| <b>MpMTPSL4</b>   | <i>Marchantia</i> Terpene<br>synthase like gene                                                                | KU664191     | This study                    |
| <b>MpMTPSL5</b>   | <i>Marchantia</i> Terpene<br>synthase like gene                                                                | KU664192     | This study                    |

|                 |                                                |          |                  |
|-----------------|------------------------------------------------|----------|------------------|
| <b>MpMTPSL6</b> | <i>Marchantia</i> Terpene synthase like gene   | KU664193 | This study       |
| <b>MpMTPSL7</b> | <i>Marchantia</i> Terpene synthase like gene   | KU664194 | This study       |
| <b>MpMTPSL8</b> | <i>Marchantia</i> Terpene synthase like gene   | KU664195 | This study       |
| <b>MpMTPSL9</b> | <i>Marchantia</i> Terpene synthase like gene   | KU886240 | This study       |
| <b>MpDTPS1</b>  | <i>Marchantia</i> Diterpene synthase like gene | KU664196 | This study       |
| <b>MpDTPS3</b>  | <i>Marchantia</i> Diterpene synthase like gene | KU664197 | This study       |
| <b>MpDTPS4</b>  | <i>Marchantia</i> Diterpene synthase like gene | KU664198 | This study       |
| <b>4S-LS</b>    | 4S-limonene synthase [ <i>Mentha spicata</i> ] | AAC37366 | Colby et al 1993 |

Li, G. et al. (2012). Nonseed plant *Selaginella moellendorffii* has both seed plant and microbial types of terpene synthases. *Proc. Natl. Acad. Sci.* 109: 20774–20774.

Hayashi, K.I., Kawaide, H., Notomi, M., Sakigi, Y., Matsuo, A., and Nozaki, H. (2006). Identification and functional analysis of bifunctional ent-kaurene synthase from the moss *Physcomitrella patens*. *FEBS Lett.* 580: 6175–6181.

Hohn, T.M. and Beremand, P.D. (1989). Isolation and nucleotide sequence of a sesquiterpene cyclase gene from the trichothecene-producing fungus *Fusarium sporotrichioides*. *Gene* 79: 131–138.

Wildung, M.R. and Croteau, R. (1996). A cDNA clone for taxadiene synthase, the diterpene cyclase that catalyzes the committed step of taxol biosynthesis. *J. Biol. Chem.* 271: 9201–9204.

Facchini, P.J. and Chappell, J. (1992). Gene family for an elicitor-induced sesquiterpene cyclase in tobacco. *Proc. Natl. Acad. Sci. U. S. A.* 89: 11088–11092.

Proctor, R.H. and Hohns, T.M. (1993). Aristolochene Synthase isolation, characterization, and bacterial expression of a sesquiterpenoid biosynthetic gene (AriI) from *Penicillium roqueforti*. *J. Biol. Chem.* 268: 4543–4546.

Hsiao, N.-H. and Kirby, R. (2008). Comparative genomics of *Streptomyces avermitilis*, *Streptomyces cattleya*, *Streptomyces maritimus* and *Kitasatospora aureofaciens* using a *Streptomyces coelicolor* microarray system. *Antonie Van Leeuwenhoek* 93: 1–25.

Colby, S.M., Alonso, W.R., Katahira, E.J., McGarvey, D.J., and Croteau, R. (1993). 4S-limonene synthase from the oil glands of spearmint (*Mentha spicata*). cDNA isolation, characterization, and bacterial expression of the catalytically active monoterpene cyclase. *J. Biol. Chem.* 268: 23016–23024.

**Supplemental Table 7.** Kinetic constants for the terpene synthase-like enzymes from *M. polymorpha*.

Kinetic analysis was performed using purified His-tagged MpMTPSL proteins with preferred substrates from Table 1 (ND-No activity detected).

| Enzyme          | Preferred substrate | $K_M$ ( $\mu\text{M}$ ) | $k_{\text{cat}}$ ( $\text{s}^{-1}$ ) | $k_{\text{cat}}/K_M$ ( $\text{s}^{-1} \text{mM}^{-1}$ ) |
|-----------------|---------------------|-------------------------|--------------------------------------|---------------------------------------------------------|
| <b>MpMTPSL1</b> | ND                  | -                       | -                                    | -                                                       |
| <b>MpMTPSL2</b> | NPP                 | $36.15 \pm 4.56$        | $9.9 \times 10^{-2} \pm 0.004$       | 2.76                                                    |
| <b>MpMTPSL3</b> | FPP                 | $4.71 \pm 0.70$         | $5.2 \times 10^{-2} \pm 0.001$       | 11.04                                                   |
| <b>MpMTPSL4</b> | FPP                 | $17.98 \pm 2.24$        | $5.8 \times 10^{-2} \pm 0.001$       | 3.21                                                    |
| <b>MpMTPSL5</b> | FPP                 | $8.93 \pm 1.29$         | $14.5 \times 10^{-2} \pm 0.004$      | 16.22                                                   |
| <b>MpMTPSL6</b> | NPP                 | $1.42 \pm 0.60$         | $0.4 \times 10^{-2} \pm 0.001$       | 2.98                                                    |
| <b>MpMTPSL7</b> | FPP                 | $23.04 \pm 1.44$        | $1.65 \times 10^{-2} \pm 0.001$      | 0.72                                                    |
| <b>MpMTPSL8</b> | ND                  | -                       | -                                    | -                                                       |
| <b>MpMTPSL9</b> | FPP                 | $101.5 \pm 26.30$       | $7.13 \times 10^{-1} \pm 0.107$      | 70.2                                                    |

**Supplemental Table 8.**  $^1\text{H}$ -NMR for compound **7** (from Figure 6) in  $\text{CDCl}_3$ .

The structure of peak **7** was determined based on  $^1\text{H}$ ,  $^{13}\text{C}$ ,  $^1\text{H}$ - $^1\text{H}$ -gCOSY, and  $^1\text{H}$ - $^{13}\text{C}$ -HSQC experiments and on comparison with  $^1\text{H}$  and  $^{13}\text{C}$  data of other known aromadendrene alcohols. The  $^1\text{H}$ -NMR demonstrated 2 singlet methyl groups at  $\delta_{\text{H}}$  1.25 and  $\delta_{\text{H}}$  1.04 and two methyl doublets at  $\delta_{\text{H}}$  0.86 and  $\delta_{\text{H}}$  0.91 (d,  $J=6.5$  Hz.) corresponding to  $\text{H}_3$ -14 and  $\text{H}_3$ -15. The  $^{13}\text{C}$ -NMR revealed an absence of olefinic carbons in the  $\delta_{\text{C}}$  130-150 ppm range, and revealed the presence of a quarternary alcohol at  $\delta_{\text{C}}$  83.4. Because (+)-ledol, (+)-globulol, and (-)-viridiflorol all exhibit a C-10 secondary alcohol at  $\delta_{\text{C}}$  75.0 ppm, the downfield shift of the  $\delta_{\text{C}}$  83.4 alcohol indicates that it is likely at the C-1 or C-5 bridgehead carbon (Figure 7). The  $^1\text{H}$ - $^1\text{H}$ -gCOSY revealed all of the expected couplings for a gurjunene skeleton, except that the H-6 cyclopropane ring proton was present as a doublet in *cis* configuration with H-7 (H-6= d,  $J=10$  Hz, H-7= td,  $J=10, 6, 1$ ). In the other gurjunene alcohols, H-6 appears as a triplet coupling with H-5 and H-7 (Kaplan et al., 2000). This suggests that the position of the quarternary alcohol to be at the C-5 bridgehead carbon

| Position          | $\delta_{\text{H}}$                   |
|-------------------|---------------------------------------|
| H-1               | 1.66-1.78 (1H, m, complex)            |
| H-2               | 1.80-1.95 (1H, <i>m</i> , complex)    |
| H-3 <sub>eq</sub> | 1.80-1.95 (1H, <i>m</i> , complex)    |
| H-3 <sub>ax</sub> | 1.08-1.18 (1H, <i>m</i> , complex)    |
| H-4               | 1.66-1.78 (1H, <i>m</i> , complex)    |
| H-5               | ---                                   |
| H-6               | 0.18 (1H, <i>d</i> , $J=10$ )         |
| H-7               | 0.67 (1H, <i>ddd</i> , $J=10, 9, 6$ ) |
| H-8 <sub>eq</sub> | 1.80-1.95 (1H, <i>m</i> , complex)    |
| H-8 <sub>ax</sub> | 1.08-1.24 (1H, <i>m</i> , complex)    |
| H-9 <sub>eq</sub> | 1.30-1.48 (1H, <i>m</i> , complex)    |
| H-9 <sub>ax</sub> | 1.30-1.48 (1H, <i>m</i> , complex)    |
| H-10              | 1.80-1.95 (1H, <i>m</i> , complex)    |
| H-11              | ---                                   |
| H-12              | 1.04 (3H, <i>s</i> )                  |
| H-13              | 1.25 (3H, <i>s</i> )                  |
| H-14              | 0.92 (1H, <i>d</i> , $J=6$ )          |
| H-15              | 0.86 (1H, <i>d</i> , $J=6$ ).         |

**Supplemental Table 9.**  $^{13}\text{C}$ -NMR data for compound 7 (from Figure 6), (+)-globulol, and (+)-ledol in  $\text{CDCl}_3$ .

| $\delta_{\text{C}}$ position | <b>7</b> <sup>‡</sup> | (+)-globulol <sup>a</sup> | ledol <sup>b</sup> |
|------------------------------|-----------------------|---------------------------|--------------------|
| C-1                          | 57.3                  | 57.0                      | 53.8               |
| C-2                          | 25.0                  | 26.1                      | 24.6               |
| C-3                          | 27.7                  | 34.6                      | 30.8               |
| C-4                          | 47.3                  | 36.3                      | 38.4               |
| C-5                          | 83.4                  | 39.7                      | 40.8               |
| C-6                          | 25.2                  | 28.3                      | 23.4               |
| C-7                          | 29.3                  | 26.7                      | 25.0               |
| C-8                          | 21.1                  | 20.2                      | 20.3               |
| C-9                          | 32.0                  | 44.6                      | 39.2               |
| C-10                         | 34.5                  | 75.3                      | 74.6               |
| C-11                         | 19.0                  | 19.4                      | 19.2               |
| C-12                         | 17.2                  | 15.8                      | 15.4               |
| C-13                         | 30.7                  | 28.7                      | 28.7               |
| C-14                         | 13.6                  | 20.1                      | 30.5               |
| C-15                         | 22.5                  | 16.0                      | 16.0               |

- a) Toyota, M., Tanaka, M., and Asakawa, Y. (1999). A revision of the  $^{13}\text{C}$  NMR spectral assignment of globulol. *Spectroscopy* 14: 61–66.
- b) Kaplan, M. a, Pugialli, H.R.L., Lopes, D., Gottlieb, H.E., Auxiliadora, M., and Kaplan, C. (2000). The stereochemistry of ledol from *Renealmia chrysotrycha*: an NMR study. *Phytochemistry* 55: 749–53.

<sup>‡</sup> recorded on a Varian JNMR 400 MHz spectrometer at 100 MHz.

**Supplemental Table 10.**  $^1\text{H}$  and  $^{13}\text{C}$  NMR data for atiseranol.

NMR experiments were conducted on a Bruker Avance 700 spectrometer equipped with a 5-mm HCN cryogenic probe. Structural analysis was performed using one-dimensional  $^1\text{H}$ , and two-dimensional DQF-COSY, HSQC, HMQC, HMBC, and NOESY experiment spectra acquired at 700 MHz, and one-dimensional  $^{13}\text{C}$  spectrum (174 MHz) using standard experiments from the Bruker TopSpin version 1.4 software. An analysis of the DQF-COSY and HSQC spectra led to the unambiguous assignment of the protons and corresponding carbon signals. Correlations from the HMBC spectra were used to build the planar structure, and the stereochemistry was determined by the NOESY experiment. In the NOESY spectrum, the correlations of H<sub>3</sub>-17/H-13a, H<sub>3</sub>-17/H-14b, H<sub>3</sub>-20/H-13b and H<sub>3</sub>-20/H-14a indicated that 16-OH possessed a  $\beta$ -configuration. Chemical shifts were referenced using known chloroform ( $^{13}\text{C}$  77.23,  $^1\text{H}$  7.24 ppm) signals offset from TMS, and compared to those previously reported.

| Position | MPId40              |                     |
|----------|---------------------|---------------------|
|          | $\delta_{\text{H}}$ | $\delta_{\text{C}}$ |
| 1 a      | 1.45 (1H, m)        | 39.9                |
| b        | 0.73 (1H, m)        |                     |
| 2 a      | 1.48 (1H, m)        | 18.8                |
| b        | 1.28 (1H, m)        |                     |
| 3 a      | 1.29 (1H, m)        | 42.8                |
| b        | 1.05 (1H, m)        |                     |
| 4        |                     | 33.7                |
| 5        | 0.72 (1H, m)        | 57.0                |
| 6 a      | 1.36 (1H, m)        | 19.3                |
| b        | 1.20 (1H, m)        |                     |
| 7        | 1.26 (1H, m)        | 40.2                |
|          | 1.03 (1H, m)        |                     |
| 8        |                     | 34.4                |
| 9        | 1.12 (1H, m)        | 51.9                |
| 10       |                     | 38.3                |
| 11       | 1.87 (1H, m)        | 23.8                |
|          | 1.07 (1H, m)        |                     |
| 12       | 1.44 (1H, m)        | 38.5                |
| 13 a     | 1.56 (1H, m)        | 24.7                |
| b        | 1.38 (1H, m)        |                     |
| 14 a     | 1.73 (1H, m)        | 27.9                |
| b        | 0.70 (1H, m)        |                     |
| 15       | 1.26 (1H, m)        | 58.3                |
|          | 1.11 (1H, m)        |                     |
| 16       |                     | 72.8                |
| 17       | 1.19 (3H, s)        | 31.0                |
| 18       | 0.76 (3H, s)        | 34.0                |
| 19       | 0.73 (3H, s)        | 22.3                |
| 20       | 0.85 (3H, s)        | 14.5                |



**Supplemental Table 11.** Primers used for cloning full-length Mp*MTPSL* genes.

| <b>Gene</b>            | <b>Primer</b> | <b>Sequences (5' → 3')</b>       |
|------------------------|---------------|----------------------------------|
| <b>Mp<i>MTPSL1</i></b> | MpMTPSL-1_F1  | ATGTCTGCGAGGGACAATGG             |
|                        | MpMTPSL-1_R1  | TTAGATGATTCTGTGGTCTT             |
| <b>Mp<i>MTPSL2</i></b> | MpMTPSL-2_F1  | ATGGCGGCAAAGCTCACAGGAGTTT        |
|                        | MpMTPSL-2_R1  | TTATCTCAAGTAGTGGTCCT             |
| <b>Mp<i>MTPSL2</i></b> | SK299         | ATGATCGGACTGGTGAGCAGTATTTATG     |
|                        | MpMTPSL-2_R1  | TTATCTCAAGTAGTGGTCCT             |
| <b>Mp<i>MTPSL3</i></b> | MpMTPSL-3F    | ATGGCTTCACAACACTCGGCATCTACC      |
|                        | MpMTPSL-3R    | CTACATTTTCAGATTTTCTTCTATC        |
| <b>Mp<i>MTPSL4</i></b> | MpMTPSL-4F    | ATGGCACCAACTTTAGACTCGG           |
|                        | MpMTPSL-4R    | CTAGACACTGTTGATGTGTTTTAC         |
| <b>Mp<i>MTPSL5</i></b> | SK202F        | ATGGCCCCAAGTTTAGACTCGGATTCTAC    |
|                        | K199R         | GTAGAACAATCATCAAGCGTCAGTAA       |
| <b>Mp<i>MTPSL6</i></b> | MpMTPSL-6_F1  | ATGAAGCCCATCATGGTGAGCTCTG        |
|                        | MpMTPSL-6_R1  | TTAAACGAAATCACCTTGAACCAATCGTC    |
| <b>Mp<i>MTPSL7</i></b> | MpMTPSL-7_F1  | ATGTCGAGCATGGCGAGCTGTG           |
|                        | MpMTPSL-7_R1  | TTAAATGAGATTACCTTGAACCAAGCCG     |
| <b>Mp<i>MTPSL8</i></b> | SK261F        | ATGGGCCCAAGTTTAAACTCG            |
|                        | SK262R        | CTACCTTTTTAGATTTCTGTGTCTG        |
| <b>Mp<i>MTPSL9</i></b> | SK417F        | CATGCCATGGATGACGAAGACGCTTCCGGCT  |
|                        | SK418R        | CCCAAGCTTCTACACACAGTCACCCGCGAACC |

**Supplemental Table 12.** Primers used for cloning full length MpDTPS genes.

| <b>Gene</b>    | <b>Primer</b> | <b>Sequences (5' → 3')</b>               |
|----------------|---------------|------------------------------------------|
| <b>MpDTPS1</b> | SK005F        | GGGAATTCCATATGATGCTAGCCGTCGATGAACCGAC    |
|                | SK006R        | CCCAAGCTTCTACTCGCTGGGGAAGCGTTTG          |
| <b>MpDTPS2</b> | SK007F        | GGGAATTCCATATGATGGCGAGCTCGACTGCC         |
|                | SK008R        | GGAATTCTCAAGAGAGCACGGGTTTCG              |
| <b>MpDTPS3</b> | SK009F        | GGAATTCCATATGATGGCATTCTCGTTAGCAGG        |
|                | SK010R        | ATAAGAATGCGGCCGCTCAGGCCACAGGCTCGAAGAGTAG |
| <b>MpDTPS4</b> | SK341F        | AGCCATGATTTCGAATGATGAGG                  |
|                | SK343R        | CTAGGCCTGTTCACTTTTCGATGG                 |

**Supplemental Table 13.** Primers used for DNA sequencing.

| <b>Gene</b>     | <b>Primer</b> | <b>Sequence (5' → 3')</b>    |
|-----------------|---------------|------------------------------|
| <b>MpMTPSL1</b> | SK187R        | GGAAACCGAAAATGTCATTATGCCAACC |
|                 | SK161F        | GTGACAGATCTCTTCGTCAAAGCTC    |
|                 | SK162F        | ACTTGTGGCTCGAGTACTGTGAAAG    |
|                 | SK163F        | ATCTCGGCTCTTACGTCTCGAATAC    |
|                 | SK164F        | CAACAAGGTTCTCATGTGGTTCTTC    |
|                 | MpMTPSL-1_sF2 | GATGTTGATAAATCACGAGG         |
|                 | MpMTPSL-1_sF3 | CAGAACTACTTACTGGGATGT        |
|                 | MpMTPSL-1_sR2 | TTGTTCCATGCTTGGGCGCC         |
|                 | MpMTPSL-1_sR3 | GCCATTGTCGAGCTTTGACG         |
| <b>MpMTPSL2</b> | SK167F        | ATCAATGAGTTCGAGACAAGAGTGG    |
|                 | SK168F        | TCACAGGAGTTTCTCCAAGCTTATG    |
|                 | SK169F        | TTAGATTTGCAGCCTTTAGCATCAG    |
|                 | SK170F        | TCTGATAGCCGAGTTCAATGAAAAG    |
|                 | MpMTPSL-2_sF2 | GAGTTCAATGAAAAGGCCCA         |
|                 | MpMTPSL-2_sR2 | ACCACAAGATAACCTTCTGC         |
|                 | MpMTPSL-2_sR3 | TGATACTCTGCGGATAATCT         |
| <b>MpMTPSL3</b> | SK228F        | TCCTGAGCTTATGGGCTATGTGTTC    |
|                 | SK229F        | GTGGAATGACCCTGAGAACAAGAG     |
|                 | SK230R        | CTCTTCAGCTGCCTACGAAACTGTC    |
|                 | SK282F        | ACAAGGACAGTTTCGTAGGC         |
|                 | SK283R        | CAATGTCTGTGTACTIONCGGGAG     |
|                 | SK194R        | TTGGGGTAACGGTGCTGGAAATGTG    |

|                 |                 |                                   |
|-----------------|-----------------|-----------------------------------|
|                 | SK195R          | GTAGATGCCGAGTGTTGTGAAGCCA         |
| <b>MpMTPSL4</b> | SK196R          | TGCCCATAGAACTCAACCAGTCAAAAG       |
|                 | SK197R          | GCATTCGGTAGTCTTGGGGTTCAGTC        |
|                 | SK221R          | CTGGGCGATTCTAGTCGTATACTC          |
|                 | SK222F          | CTCCGATTTACATATTCCCAACAC          |
|                 | SK223F          | GAGTATACGACTAGAATCGCCCAG          |
|                 | SK240R          | CGAAGGGTGACGTAATCAGCCACATTC       |
|                 | SK286F          | ATTCAGAGCCCCATACATCC              |
|                 | SK287R          | ATGCCCATAGAACTCAACCAG             |
|                 | <b>MpMTPSL5</b> | SK284F                            |
| SK285R          |                 | AGCCTCAATCTCCATCAACG              |
| SK185R          |                 | GAAAACAAGAAACGGCATCACACCTCC       |
| SK186R          |                 | CTTGTTCCGAGAGACAGCCCGTTATGT       |
| SK198F          |                 | CCTGTTGAGTGTATATCTAGACAGGCTG      |
| SK199R          |                 | TTACTGACGCTTGATGATTTGTTCTAC       |
| SK202F          |                 | ATGGCCCCAAGTTTAGACTCGGATTCTA<br>C |
| <b>MpMTPSL6</b> | SK121F          | CATTCTTTTCATCGTCACTGCG            |
|                 | SK122R          | TCGTTGATGTGGCTTGAGG               |
|                 | SK295F          | GAACATCACCGCTTTGGAAG              |
| <b>MpMTPSL7</b> | SK038F          | ATGTCGAGCATGGCGAGCTGTGGTGC        |
|                 | SK039R          | CTAAATGAGATTACCTTGGAACCAGC        |
|                 | SK119F          | GTCAGTTAGAGCACGAGTACAG            |
|                 | SK120R          | GAAATAGAGGAAGGTGAGGCG             |

|                 |        |                              |
|-----------------|--------|------------------------------|
|                 | SK180R | CGAGTCGGATGTAGTTTCTTGTAC     |
|                 | SK076F | GATTTAGAAATGCCTGCATGGACTATC  |
| <b>MpMTPSL8</b> | SK200F | CCTGTTGAGTGTATATCTAGACAAGCTG |
|                 | SK201R | CTACCTTTTTAGATTTCTGTGTCTG    |
|                 | SK211F | ATGGCGGCCAAATTCTCTAAGCTTATTG |
|                 | SK212R | CTACCTTTTTAGATTTCTGTGTCTG    |
|                 | SK251F | CCTGACAACGAGCGATTACTGGAA     |
|                 | SK252F | CTGATTGCATCAGAGTTCGACGAC     |
|                 | SK253F | TTCATGAATACGACTGCCAATCTTAC   |
|                 | SK254F | AGACTGGATTCCTGGAACGCACGAG    |
|                 | SK261F | ATGGGCCCAAGTTTAAACTCG        |
|                 | SK262R | CTACCTTTTTAGATTTCTGTGTCTG    |
|                 | SK187R | GGAAACCGAAAATGTCATTATGCCAACC |
|                 | SK188R | GATGTCAGTACAAGCGGCCAGCATATTC |
|                 | SK288R | GGTCGCTCTCCGACTGCCTTAG       |
|                 | SK289R | CTCGTTGTCAGGGTCATTCCAC       |
| <b>MpMTPSL9</b> | SK419F | GATGCCTGATGGTGGAGC           |
|                 | SK420F | TACAACAAGATATATCCACTGATCCC   |
|                 | SK421R | CGTCCTCGAACTCCTTGTA          |
|                 | SK422R | CACGTGAGTGATAATGTTTCTCG      |

**Supplemental Table 14.** Primers used for cloning MpMTPSL genes into bacterial (*E. coli*) protein expression vectors and their restriction site.

| Gene            | Primer | Sequence (5' → 3')                            | Restriction Site | Vector |
|-----------------|--------|-----------------------------------------------|------------------|--------|
| <b>MpMTPSL1</b> | SK159F | CATATGATGTCTGCGAGGGACAATG<br>GGGCTATC         | <i>NdeI</i>      | pET28a |
|                 | SK160R | AAGCTTTTTGATGATTCTGTGGTCTT<br>CGTTGTATC       | <i>HindIII</i>   |        |
| <b>MpMTPSL2</b> | SK227F | TATACCATGGGCATGGCGGCAAAG<br>CTCACAG           | <i>NcoI</i>      | pET28b |
|                 | SK292R | CGCGGATCCCTGTCTCAAGTAGTGG<br>TCCTCTTTTTGGTATC | <i>BamHI</i>     |        |
| <b>MpMTPSL3</b> | SK171F | CATATGATGGCTTCACAACACTCGG<br>CATCTACCG        | <i>NdeI</i>      | pET28a |
|                 | SK172R | AAGCTTCTTCATTTTCAGATTTTCTT<br>CTATCTCAG       | <i>HindIII</i>   |        |
| <b>MpMTPSL4</b> | SK173F | GAGCTCATGGCACCAACTTTAGACT<br>CGGATTCTAC       | <i>SacI</i>      | pET28a |
|                 | SK174R | AAGCTTCTTGACACTGTTGATGTGTT<br>TTAC            | <i>HindIII</i>   |        |
| <b>MpMTPSL5</b> | SK207F | CGGGATCCATGGCCCAAGTTTAGA<br>CTCG              | <i>BamHI</i>     | pET28a |
|                 | SK208R | ATAAGAATGCGGCCGCTTACTGACG<br>CTTGATGATTTG     | <i>NotI</i>      |        |
| <b>MpMTPSL6</b> | SK273F | TCTAGA<br>GAAGGAGAATGAAGCCCATC                | <i>XbaI</i>      | pET28b |
|                 | SK275R | CCCAAGCTTGTAACGAAATCACCT<br>TG                | <i>HindIII</i>   |        |
| <b>MpMTPSL7</b> | SK077F | GGAATTCCATATGTGCGAGCATGGCG<br>AGCTGTGGTGC     | <i>NdeI</i>      | pET28a |
|                 | SK078R | GGAATTCCTAAATGAGATTACCTTG<br>GAACCAGC         | <i>EcoRI</i>     |        |
| <b>MpMTPSL8</b> | SK259F | CGCGGATCCATGGGCCCAAGTTTAA<br>ACTC             | <i>BamHI</i>     | pET28a |
|                 | SK260R | ACGCGTCGACCTACCTTTTTAGATTT<br>CC              | <i>SalI</i>      |        |
| <b>MpMTPSL9</b> | SK423F | GGGAATTCCATATGACGAAGACGCT<br>TCCGGCT          | <i>NdeI</i>      | pET28a |
|                 | SK424R | CCGGAATTCCTACACACAGTCACCC<br>GCGAACC          | <i>EcoRI</i>     |        |

**Supplemental Table 15.** Primers used for cloning MpMTPSL genes into specific restriction sites within yeast expression vectors.

| Gene            | Primer      | Sequences (5' → 3')                          | Restriction Site | Vector |
|-----------------|-------------|----------------------------------------------|------------------|--------|
| <b>MpMTPSL1</b> | mmTPS1NotIF | GGGGCGGCCGCAAACAATGT<br>CTGCGAGGGACAATGGGGCT | <i>NotI</i>      | X-HIS  |
|                 | mmTPS1SpeIR | GACTAGTTTAGATGATTCTGTG<br>GTTTCGTTG          | <i>SpeI</i>      |        |
| <b>MpMTPSL3</b> | mmTPS3NotIF | GGGGCGGCCGCAAACAATGG<br>CTTCACAACACTCGGCATC  | <i>NotI</i>      | X-HIS  |
|                 | mmTPS3SpeIR | GACTAGTCTACATTTTCAGATT<br>TTCTTCTATC         | <i>SpeI</i>      |        |
| <b>MpMTPSL4</b> | mmTPS4SpeIF | GACTAGTAAAACAATGGCACCA<br>ACTTTAGACTCGG      | <i>SpeI</i>      | X-HIS  |
|                 | mmTPS4SacIR | GGGGAGCTCCTAGACACTGTT<br>GATGTGTTTTAC        | <i>SacI</i>      |        |
| <b>MpMTPSL5</b> | mmTPS5NotIF | GGGGCGGCCGCAAACAATGC<br>AGGAGATTCTTTACTTCC   | <i>NotI</i>      | X-HIS  |
|                 | mmTPS5SpeIR | GACTAGTTTAAACGAAATCACC<br>TTGGAACC           | <i>SpeI</i>      |        |
| <b>MpMTPSL6</b> | mmTPS6NotIF | GGGGCGGCCGCAAACAATGA<br>AGCCCATCATGGTGAGCTC  | <i>NotI</i>      | X-HIS  |
|                 | mmTPS6SpeIR | GACTAGTTTAAACGAAATCACC<br>TTGGAACC           | <i>SpeI</i>      |        |
| <b>MpMTPSL7</b> | mmTPS7SacIF | GGGGAGCTCAAACAATGGCG<br>AGCTGTGGTGCCGGGAAC   | <i>SacI</i>      | X-HIS  |
|                 | mmTPS7PacIR | CCTTAATTAATTACGCCAGCTA<br>TTTAGGTGACAC       | <i>PacI</i>      |        |
| <b>MpMTPSL9</b> | SK445F      | GGGGCGGCCGCAAACAATGA<br>CGAAGACGCTTCCG       | <i>NotI</i>      | X-HIS  |
|                 | SK446R      | GACTAGTTCTACACACAGTCAC<br>CCGCGAACC          | <i>SpeI</i>      |        |

**Supplemental Table 16.** Primers used for qualitative RT-PCR.

| <b>Gene</b>     | <b>Primer</b> | <b>Sequence (5' → 3')</b> |
|-----------------|---------------|---------------------------|
| <b>MpMTPSL1</b> | SK309F        | CCTTTGTTCAATTGTGTCTCCG    |
|                 | SK310R        | ACAAGTCCCTGAAAGCTGATG     |
| <b>MpMTPSL2</b> | SK302F        | CTTGAAATCTGGAGCGACATG     |
|                 | SK303R        | AGAGCAGAACCACAAGATAACC    |
| <b>MpMTPSL3</b> | SK282F        | ACAAGGACAGTTTCGTAGGC      |
|                 | SK283R        | CAATGTCTGTGTACTIONCGGGAG  |
| <b>MpMTPSL4</b> | SK286F        | ATTCAGAGCCCCATACATCC      |
|                 | SK287R        | ATGCCCATAGAACTCAACCAG     |
| <b>MpMTPSL5</b> | SK284F        | TTGGTTCTCTTGTGGACTGAC     |
|                 | SK285R        | AGCCTCAATCTCCATCAACG      |
| <b>MpMTPSL6</b> | SK121F        | CATTCTTTTCATCGTCACTGCG    |
|                 | SK122R        | TCGTTGATGTGGCTTGAGG       |
| <b>MpMTPSL7</b> | SK119F        | GTCAGTTAGAGCACGAGTACAG    |
|                 | SK120R        | GAAATAGAGGAAGGTGAGGCCG    |
| <b>MpMTPSL8</b> | SK311F        | GAAATAGAGGAAGGTGAGGCCG    |
|                 | SK312R        | TGCCCAAAGAAACGATCCAG      |
| <b>MpMTPSL9</b> | SK419F        | GATGCCTGATGGTGGAGC        |



|                |        |                        |
|----------------|--------|------------------------|
|                | SK421R | CGTCCTCGAACTCCTTGTA    |
| <b>Actin</b>   | SK101F | ATGAAGATTCTGACCGAGCG   |
|                | SK102R | GAAGTCCAGGGCAATGTAGG   |
| <b>GAPDH</b>   | SK280F | GTCATTCAGAGTACCCACCG   |
|                | SK281R | TCCCTTCATTTGCGCTTCAG   |
| <b>MpDTPS1</b> | SK314F | CTACTTCTCAACTCTGTCGTGC |
|                | SK313R | GGACACATACTTCAGCTCATCG |
| <b>MpDTPS2</b> | SK316F | TGGAGGTTGCAGGAATTACAG  |
|                | SK315R | CTTGGTCAGTCTCTTCGTGTG  |
| <b>MpDTPS3</b> | SK318F | CTCGCTCTGCCCTACAAAG    |
|                | SK317R | TCCCAGTCCAAAATCTCGTG   |
| <b>MpDTPS4</b> | SK320F | CAGCAAATACAAGGGCGTG    |
|                | SK321R | AAACTAACCCAGCTCGTGTC   |
